# Supplementary material for: Mid-Holocene climate change over China: model-data discrepancy
Source: Copernicus journal article supplement (doi:10.5194/cp-2018-145), 2018-11-13
Supplement: Supplementary file [file cp-2018-145-AC1-supplement.zip]

# Mid-Holocene climate change over China: model-data discrepancy

Yating Lin <sup>1,2,4</sup>, Gilles Ramstein <sup>2</sup>, Haibin Wu <sup>1,3,4</sup>, Raj Rani <sup>2</sup>, Pascale Braconnot <sup>2</sup>,

Masa Kageyama <sup>2</sup>, Qin Li <sup>1,3</sup>, Yunli Luo <sup>5</sup>, Ran Zhang <sup>6</sup> and Zhengtang Guo <sup>1,3,4</sup>

1. Key Laboratory of Cenozoic Geology and Environment, Institute of Geology and Geophysics, Chinese Academy of Sciences, Beijing 100029, China

2. Laboratoire des Sciences du Climat et de l'Environnement, LSCE/IPSL, CEA-CNRS-UVSQ, Université Paris-Saclay, Gif-sur-Yvette 91191, France

3. CAS Center for Excellence in Life and Paleoenvironment, Beijing, 100044, China

4. University of Chinese Academy of Sciences, Beijing 100049, China

5. Institute of Botany, Chinese Academy of Sciences, Beijing 100093, China

6. Institute of Atmospheric Physics, Chinese Academy of Sciences, Beijing 100029, China

## Abstract:

The mid-Holocene period (MH) has long been an ideal target for the validation of Global Circulation Model (GCM) results against reconstructions gathered in global datasets. These studies aimed to test the GCM sensitivity mainly to the seasonal changes induced by the orbital parameters (precession). Despite widespread agreement between model results and data on the MH climate, some important differences still exist. There is no consensus on the continental size of the MH thermal climate response, which makes regional quantitative reconstruction critical to obtain a comprehensive understanding of the MH climate patterns. Here, we compare the annual and seasonal outputs from the most recent Paleoclimate Modelling Intercomparison Projects Phase 3 (PMIP3) models with an updated synthesis of climate reconstruction over China, including, for the first time, a seasonal cycle of temperature and precipitation. Our results indicate that the main discrepancies between model-data for MH climates are the annual and winter mean temperature. A warmer-than-present climate condition are derived from pollen data for both annual mean temperature (~0.7 K on average) and winter mean temperature

(~1 K on average), while most of the models provide a linear response driven by the seasonal forcing (a decreased annual mean temperature with a warmer summer and colder winter). By conducting simulations in BIOME4 and CESM version 1.0.5, we show that to capture the seasonal pattern reconstructed by data, it is critical to assess surface processes. These results pinpoint the crucial importance of including the non-linear of the surface water and energy balance to vegetation changes.

*Keywords:* PMIP3   Pollen data   Inverse Vegetation Model   Seasonal climate change

## **1. Introduction**

Much attention of paleoclimate study has been focused on the current interglacial (the Holocene), especially the mid-Holocene (MH,  $6\pm0.5$  ka). The major difference in the experimental configuration between the MH and pre-Industrial (PI) arises from the orbital parameters which brings about an increase in the amplitude of the seasonal cycle of insolation of the Northern Hemisphere and a decrease in the Southern Hemisphere (Berger, 1978). Thus, the MH provides an excellent case study on which to base an evaluation of the climate response to changes in the distribution of insolation. Great efforts are devoted by the modeling community to the design of the MH common experiments using similar boundary conditions (Joussaume and Taylor, 1995; Harrison et al., 2002; Braconnot et al., 2007a, b). In addition, much work has been done to reconstruct the paleoclimate change based on different proxies at global and continental scale (Guiot et al., 1993; Kohfeld and Harrison, 2000; Prentice et al., 2000; Bartlein et al., 2011). The greatest progress in understanding the MH climate change and

variability has consistently been made by comparing large-scale analyses of data with simulations from global climate models (Joussaume et al., 1999; Liu et al., 2004; Harrison et al., 2014).

However, the source of discrepancies between model and data is still an open and stimulating question. Two types of inconsistencies have been identified: 1) where the model and data show opposite signs, for instance, paleoclimate evidence from data-records indicates an increase of about 0.5 K in global annual mean temperature during the MH compared with PI (Shakun et al. 2012; Marcott et al. 2013), while there is a cooling trend in model simulations (Liu et al., 2014). 2) where the same trend is displayed by both model and data but with different magnitudes. Previous studies have shown that while climate models can successfully reproduce the direction and large-scale patterns of past climate changes, they tend to consistently underestimate the magnitude of change in the monsoons of the Northern Hemisphere as well as the amount of the MH precipitation over northern Africa (Braconnot et al., 2012; Harrison et al., 2015). Moreover, significant spatial variability has been noted in both observations and simulations (Peyron et al. 2000; Davis et al. 2003; Braconnot et al., 2007a; Wu et al. 2007; Bartlein et al. 2011), which makes regional quantitative reconstruction (Davis et al., 2003; Mauri et al., 2015) essential to obtain a comprehensive understanding of the MH climate patterns, and to act as a benchmark to evaluate climate models (Fischer and Jungclaus, 2011; Harrison et al., 2014;).

China offers two advantages in respect to these issues. The sheer expanse of the country means that the continental response to insolation changes over a large region can be investigated. Moreover, the quantitative reconstruction of seasonal climate changes during the MH, based on the new pollen dataset, provides a unique opportunity to compare the seasonal cycles for models and data. Previous studies indicate that warmer and wetter than present conditions prevailed over China during the MH and that the magnitude of the annual temperature increases varied from 2.4-5.8 K spatially, with an annual precipitation increase in

the range of 34-267 mm (e.g., Sun et al., 1996; Jiang et al., 2010; Lu et al., 2012; Chen et al., 2015). However, Jiang et al. (2012) clearly show a mismatch between multi-proxy reconstructions and model simulations. In terms of climate anomalies (MH-PI), besides the ~1 K increase in summer temperature, 35 out of 36 Paleoclimate Modelling and Coupled Modelling Intercomparison Projects (PMIP) models reproduce annual (~0.4 K) and winter temperatures (~1.4 K) that are colder than the baseline, and a drier-than-baseline climate in some western and middle regions over China is depicted in models (Jiang et al. 2013). Jiang et al. (2012) were the first to point out the model-data discrepancy over China during the MH, but the lack of seasonal reconstructions in their study limits comparisons with simulations..

An important issue raised by Liu et al. (2014) is that the discrepancy at the annual level could be due to incorrect reconstructions of the seasonal cycle, a key objective in our paper. Moreover, it has been suggested that the vegetation change can strengthen the temperature response in high latitudes (O'Ishi et al., 2009; Otto et al., 2009), as well as alter the hydrological conditions in the tropics (Liu et al., 2007). However, compared to the substantial land cover changes in the MH derived from pollen datasets (Ni et al., 2010; Yu et al., 2000), the changes in vegetation have not yet been fully quantified and discussed in PMIP3 (Tylor et al., 2012).

In this study, for the reconstruction, we firstly used the quantitative method of biomization to reconstruct vegetation types during the MH based on a new synthesis of pollen datasets, and then used the Inverse Vegetation Model (Guiot et al. 2000; Wu et al. 2007) to obtain the annual, the mean temperature of the warmest month (MTWA) and the mean temperature of the coldest month (MTCO) climate features over China for the MH. In the case of PMIP3 models, we present a comprehensive evaluation of the state-of-the-art models based on the MH climate variables (vegetation, temperature and precipitation), using the simulations from the PMIP3. This is the first time that such progress towards a quantitative seasonal climate comparison for the MH over China has been made, thanks to the seasonal reconstruction and the PMIP3 results.

This point is crucial because the MH PMIP3 experiment is essentially one that looks at the response of the models to changes in the seasonality of insolation, and the attempt to derive reconstructions of both summer and winter climate to compare with the simulations will thus be able to answer the question posed by Liu et al. (2014) on the importance of seasonal reconstruction.

## **2. Data and Methodology**

### **2.1 Data**

In this study, we collected 159 pollen records, covering most of China, for the MH period ( $6000 \pm 500$   $^{14}\text{C}$  yr BP) (Fig. 1). Of these, 65 were from the Chinese Quaternary Pollen Database (CQPD, 2000), three were original datasets obtained in our study, and the others were digitized from pollen diagrams in published papers with a recalculation of pollen percentages based on the total number of terrestrial pollen types. These digitized 91 pollen records were selected according to three criteria: (1) clearly readable pollen diagrams with a reliable chronology with the minimum of three independent age control points since the LGM; (2) including the pollen taxa during  $6000 \pm 500$   $^{14}\text{C}$  yr BP period with a minimum sampling resolution of 1000 years per sample; (3) abandon the pollen records if the published paper mentions the influence of human activity. The age-depth model for the pollen records was estimated by linear interpolation between adjacent available dates or by regression. Using ranking schemes from the Cooperative Holocene Mapping Project, the quality of dating control for the mid-Holocene was assessed by assigning a rank from 1 to 7. And 70% of the records fell into the first and second classes (see Table 1 for detailed information) according to the Webb 1-7 standards (Webb, T. III, 1985). Vegetation type was quantitatively reconstructed using biomization (Prentice et al., 1996), following the classification of plant functional types (PFTs) and biome assignment in

122 China by the Members of China Quaternary Pollen Data (CQPD, 2000), which has been widely  
123 tested in surface sediment. The new sites (91 digitized data and three original data) added to our  
124 database improved the spatial coverage of pollen records, especially in the northwest, the  
125 Tibetan Plateau, the Loess Plateau and southern regions, where the data in the previous  
126 databases are very limited.

127 Modern monthly mean climate variables, including temperature, precipitation and cloudiness  
128 (means the cloud area fraction) have been collected for each modern pollen site based on the  
129 datasets (1951-2001) from 657 meteorological observation stations over China (data source:  
130 China Climate Bureau, China Ground Meteorological Record Monthly Report, 1951-2001).  
131 Soil properties were derived from the digital world soil map produced by the Food and  
132 Agricultural organization (FAO) (FAO, 1991), and, because of a lack of paleosol data, soil  
133 characteristics were assumed to have been the same during the MH. Atmospheric CO<sub>2</sub>  
134 concentration for the MH was taken from ice core records (EPICA community members 2004),  
135 and set at 270 ppmv.

136 A 3-layer back-propagation (BP) artificial neural network technique (ANN) was used for  
137 interpolation on each pollen site (Caudill and Butler, 1992). Five input variables (latitude,  
138 longitude, elevation, annual precipitation, annual temperature) and one output variable (biome  
139 scores) have been chosen in ANN for the modern vegetation. The ANN has been calibrated on  
140 the training set, and its performance has been evaluated on the verification set (20%, randomly  
141 extracted from the total sets). After a series of training run, the lowest verification error is  
142 obtained with 5 neurons in the hidden layer after 10000 iterations. The anomalies between past  
143 (6ka) and modern vegetation indices (biome scores) was then interpolated to the 0.2 × 0.2 ° grid  
144 resolution by applying the ANN. After that, the modern grid values are added to the values of  
145 the grid of palaeo-anomalies to provide gridded paleo-biome indices. Finally, the biome with  
146 the highest index is attributed to each grid point. This ANN method is more efficient than many

other techniques on condition that the results are validated by independent data sets, and therefore, it has been widely applied in paleoclimatology (Guiot et al., 1996; Peyron et al., 1998).

## **2.2 Climate models**

PMIP, a long-standing initiative, is a climate-model evaluation project which provides an efficient mechanism for using global climate models to simulate climate anomalies in the past periods and to understand the role of climate feedback. In its third phase (PMIP3), the models were identical to those used in the Climate Modelling Intercomparison Project 5 (CMIP5) experiments. The experimental set-up for the mid-Holocene simulations in PMIP3 followed the PMIP protocol (Braconnot et al. 2007a, b, 2012). The main forcing between the MH and PI in PMIP3 are the orbital configuration and CH<sub>4</sub> concentration. More precisely, the orbital configuration in the MH climate has an increased summer insolation and a decreased winter insolation in the Northern Hemisphere compared to the PI climate (Berger, 1978). Meantime, the CH<sub>4</sub> concentration is prescribed at 650 ppbv in the MH, while it is set at 760 ppbv in PI (Table 2).

All 13 models (Table 3) from PMIP3 that have the MH simulation have been included in our study, including eight ocean-atmosphere (OA) models and five ocean-atmosphere-vegetation (OAV) models. Means for the last 30 years were calculated from the archived time-series data on individual model grids for climate variables: near surface temperature and precipitation flux, which were bi-linearly interpolated to a uniform 2.5 ° grid, in order to get the bioclimatic variables (e.g. MAT, MAP, MTWM, MTCO, July precipitation) onto a common grid for comparison with the reconstruction results.

## 2.3 Vegetation model

The vegetation model, BIOME4 is a coupled biogeography and biogeochemistry model developed by Kaplan et al. (2003). Monthly mean temperature, precipitation, sunshine percentage (—an inverse measure of cloud area fraction), absolute minimum temperature, atmospheric CO<sub>2</sub> concentration and subsidiary information about the soil's physical properties like water retention capacity and percolation rates are the main input variables for the models. It incorporates 13 plant functional types (PFTs), which have different bioclimatic limits. The PFTs are based on physiological attributes and bioclimatic tolerance limits such as heat, moisture and chilling requirements and resistance of plants to cold. These limits determine the areas where the PFTs could grow in a given climate. A viable combination of these PFTs defines a particular biome among 28 potential options. These 28 biomes can be further classified into 8 megabiomes (Table S1). BIOME4 has been widely utilized to analyze the past, present and potential future vegetation patterns (e.g. Bigelow et al., 2003; Diffenbaugh et al., 2003; Song et al., 2005). In this study, we conducted 13 PI and the MH biome simulations using PIMP3/CMIP5 climate fields (temperature, precipitation and sunshine) as inputs. The climate fields, obtained from PMIP3/CMIP5, are the monthly mean data of the last 30 model years.

## 2.4 Statistics and interpolation for vegetation distribution

To quantify the differences between simulated (by the climate-model output) and reconstructed (from pollen) between megabiomes, a map-based statistic (point-to-point comparison with observations) called  $\Delta V$  (Sykes et al., 1999; Ni et al., 2000) was applied to our study.  $\Delta V$  is based on the relative abundance of different plant life forms (e.g. trees, grass, bare ground) and a series of attributes (e. g. evergreen, needle-leaf, tropical, boreal) for each vegetation class. The definitions and attributes of each plant form follow naturally from the BIOME4 structure and the vegetation attribute values in the  $\Delta V$  computation were defined for

BIOME4 in the same way as for BIOME1 (Sykes et al., 1999). The abundance and attribute values are given in Table 4 and Table 5, which describe the typical floristic composition of the biomes. Weighting the attributes is subjective because there is no obvious theoretical basis for assigning relative significance. Transitions between highly dissimilar megabiomes have a weighting of close to 1, whereas transitions between less dissimilar megabiomes are assigned smaller values. The overall dissimilarity between model and data megabiome maps was calculated by averaging the  $\Delta V$  for the grids with pollen data, while the value was set at 0 for any grid without data.  $\Delta V$  values  $< 0.15$  can be considered to point to very good agreement between simulated and actual distributions, 0.15-0.30 is good, 0.30-0.45 fair, 0.45-0.60 poor, and  $> 0.80$  very poor (adjusted from Zhang et al., 2010). For spatial pattern comparison, we compared the simulated vegetation distribution from BIOME4 from each model with the interpolated pattern.

## **2.5 Inverse vegetation model**

Inverse Vegetation Model (Guiot et al., 2000; Wu et al. 2007), highly dependent on the BIOME4 model, is applied to our reconstruction. The key concept of this model can be summarized in two points: firstly, a set of transfer functions able to transform the model output into values directly comparable with pollen data is defined. There is not full compatibility between the biome typology of BIOME4 and the biome typology of pollen data. A transfer matrix (Table S2) was defined in our study where each BIOME4 vegetation type is assigned a vector of values, one of each pollen vegetation type, ranging from 0 (representing an incompatibility between BIOME4 type and pollen biome type) to 15 (corresponding to a maximum compatibility). Secondly, using an iterative approach, a representative set of climate scenarios compatible with the vegetation records is identified among the climate space, constructed by systematically perturbing the input variables (e.g.  $\Delta T$ ,  $\Delta P$ ) of the model (Table S3).

Inverse Vegetation Model (IVM) provides a possibility, for the first time, to reconstruct both annual and seasonal climates for the MH over China. Moreover, it offers a way to consider the impact of CO<sub>2</sub> concentration on competition between PFTs as well as on the relative abundance of taxa, and thus make reconstruction from pollen records more reliable. More detailed information about IVM can be found in Wu et al. (2007).

We applied the inverse model to modern pollen samples to validate the approach by reconstructing the modern climate at each site and comparing it with the observed values. The high correlation coefficients ( $R=0.75-0.95$ ), intercepts close to 0 (except for the mean temperature of the warmest month), and slopes close to 1 (except for the July precipitation) demonstrated that the inversion method worked well for most variables in China (see Table 6).

### **3. Results**

#### **3.1 Comparison of annual and seasonal climate changes at the MH**

In this study, we collected 159 pollen records, broadly covering the whole of China (Fig. 1). To check the reliability of the collected data, we first categorized our pollen records into megabiomes in line with the standard tables developed for the BIOME6000 (Table S1), and compared them with the BIOME6000 dataset (Fig.2). The match between collected data and the BIOME6000 is more than 90% for both the MH and PI.

Based on pollen records, the spatial pattern of climate changes over China during the MH, deduced from IVM, are presented in Fig. 3 (left panel, points), alongside the results from PMIP3 models (shaded in Fig. 3). For temperature, a warmer-than-present annual climate condition ( $\sim 0.7$  K on average) is derived from pollen data (the points in Fig. 3a), with the largest increase occurring in the northeast (3-5 K) and a decrease in the northwest and on Tibetan Plateau. On the other hand, the results from a multi-model ensemble (MME) indicate a colder annual temperature generally ( $\sim -0.4$  K on average), with significant cooling in the south

and slight warming in the northeast (shaded in Fig. 3a). Of the 13 models, 11 simulate a cooler annual temperature compared with PI as MME. However, two models (HadeGEM2-ES and CNRM-CM5) present the same warmer condition as was found in the reconstruction (Fig. 3d). Compared to the reconstruction, the annual mean temperature during the MH is largely underestimated by most PMIP3 models, which depict an anomaly ranging from  $\sim -1.4$  to  $\sim -0.5$  K. Detailed information of reconstructed climate change derived from IVM at each pollen site can be found in Table S4.

Concerning seasonal change, during the MH, MTWA from the data is  $\sim 0.5$  K higher than PI, with the largest increase in the northeast and a decrease in the northwest. From model outputs, an average increase of  $\sim 1.2$  K is reproduced by MME, with a more pronounced warming at high latitudes which is consistent with the insolation change (Berger, 1978). Fig. 3e shows that all 13 models reproduce the same warmer summer temperatures as the data, and that HadGEM2-ES and CNRM-CM5, reproduce the largest increases among the models. Although the warmer MTWA is consistent between the models and data, there is a discrepancy between them on MTCO. In Fig. 3c, the data show an overall increase of  $\sim 1$  K, with the largest increase occurring in the northeast and a decrease of opposite magnitude on the Tibetan Plateau. Inversely, MME reproduces a decreased MTCO with an average amplitude of  $\sim -1.3$  K, the coolest areas being the southeast, the Loess Plateau and the northwest. Similarly to the MME, all 13 models simulate a colder-than-present climate with amplitudes ranging from  $\sim -2.0$  K (CCSM4 and FGOALS-g2) to  $\sim -0.7$  K (HadGEM2-ES and CNRM-CM5).

Concerning annual change in precipitation, the reconstruction shows wetter conditions during the MH across almost the whole of China with the exception of part of the northwest. The southeast presents the largest increase in annual precipitation. All but 2 models depict wetter conditions with an amplitude of  $\sim 10$  mm to  $\sim 70$  mm. The reconstruction and MME results also indicate an increased annual precipitation during MH (Fig.4a), with a much larger

magnitude visible in the reconstruction (~30 mm, ~230 mm respectively). The main discrepancy in annual precipitation between simulations and reconstruction occurs in the northeast, which is depicted as drier by the models and wetter by the data. With regard to seasonal change, the reconstruction shows an overall increase in July rainfall (~50 mm on average), with a decrease in the northwestern regions and east monsoon region at Yangtze River valley. In line with the reconstruction, the MME also shows an overall increase in rainfall (~13 mm on average), with a decrease in the northwest for July (Fig.4b). Notably, a much larger increase is simulated for the south and the Tibetan Plateau by the models, while the opposite pattern emerges along the eastern margin from both models and data. More detailed information about the geographic distribution of simulated temperature and precipitation for each model can be found in Fig. S1-S6.

### **3.2 Comparison of vegetation change at the MH**

The use of the PMIP3 database is clearly limited by the different vegetation inputs among the models for the MH period (Table S5). Only HadGEM2-ES and HadGEM2-CC use a dynamic vegetation for the MH, and the other 11 models are prescribed to PI with or without interactive LAI, which would introduce a bias to the role of vegetation-atmosphere interaction in the MH climates. To evaluate the model results against the reconstruction for the MH vegetation, we conducted 13 biome simulations in BIOME4 using PIMP3 climate fields, and the megabiome distribution for each model during the MH is displayed in Fig. 5 (see Fig. S7 for PI vegetation comparison). To quantify the model-data dissimilarity between megabiomes, a map-based statistic called  $\Delta V$  (Sykes et al., 1999; Ni et al., 2000) was applied here (detailed information is in the methodology section).

Fig. S8 shows the dissimilarity between simulations and observations for megabiomes during the MH, with the overall values for  $\Delta V$  ranging from 0.43 (HadGEM2-ES) to 0.55

(IPSL-CM5A-LR). According to the classification of  $\Delta V$  (see in the methodology section) for the 13 models, 12 (all except HadGEM2-ES) showed poor agreement with the observed vegetation distribution. Most models poorly simulate the desert, grassland and tropical forest areas for both periods, but perform better for warm mixed forest, tundra and temperate forest. However, this statistic is based on a point-to-point comparison and so the  $\Delta V$  calculated here cannot represent an estimation of full vegetation simulation due to the uneven distribution of pollen data and the potentially huge difference in area of each megabiome. For instance, tundra in our data for PI is represented by only 4 points, which counts for a small contribution to the  $\Delta V$  since we averaged it over a total of 159 points, but this calculation could induce a significant bias if these 4 points cover a large area of China.

So, we used the biome scores based on the artificial neural network technique as described by Guiot et al. (1996) for interpolation (the plots in red rectangle in Fig. 5), and compared the simulated vegetation distribution from BIOME4 for each model with the interpolated pattern. During the MH, most models are able to capture the tundra on the Tibetan Plateau as well as the combination of warm mixed forest and temperate forest in the southeast. However, all models fail to simulate or underestimate the desert area in the northwest compared to reconstructed data. The main model-data inconsistency in the MH vegetation distribution occurs in the northeast, where data show a mix of grassland and temperate forest, and the models show a mix of grassland and boreal forest.

The area statistic carried out for simulated vegetation changes (Fig. 6) reveals that the main difference during the MH, compared with PI, is that grassland replaced boreal forest in large tracts of the northeast (Fig. 5, Fig. S7). No other significant difference in vegetation distribution between the two periods was derived from models. Unlike in models, three main changes in megabiomes during the MH are depicted by the data. Firstly, the megabiomes converted from grassland to temperate forest in the northeast. Secondly, a large area of temperate forest was

replaced in the southeast by a northward expansion of warm mixed forest. Thirdly, in the northwest and at the northern margin of the Tibetan Plateau, part of the desert area changed into grassland. However, none of the models succeed in capturing these features, especially the transition from grassland into forest in the northeast during the MH. Therefore, this failure to capture vegetation changes between the two periods will lead to a cumulating inconsistency in the model-data comparison for climate anomalies because of the vegetation-climate feedbacks.

#### 4. Conclusion and Discussion

In response to the seasonal insolation change prescribed in PMIP3 for the MH, all models produce similar large-scale patterns for seasonal temperature and precipitation (higher than present July precipitation and MTWA, lower than present MTCO), with either an over- or underestimate of the climate changes when compared to the data. The main discrepancy emerging from the model-data comparison occurs in the annual and MTCO, where data show an increased value and most models simulate the opposite except CNRM-CM5 and HadGEM2-ES reproduced the higher-than-present annual temperature during MH as data showed. Besides the qualitative consistency among models, caused by the protocol of –PMIP3 experiments (Table 2), a variability in the magnitude of anomalies between models is clearly illustrated by the column bars (Fig.3 and Fig.4). These disparities in value or even pattern among models reflect the obvious differences in the response by the climate models to the MH forcing which raises on the question of the magnitude of feedbacks among models.

As positive feedbacks between climate and vegetation are important to explain regional climate changes, the failure to capture or the underestimation of the amplitude and pattern of the observed vegetation differences among models (see Section 3.2) could amplify and partly account for the model-data disparities in climate change, mainly due to variations in the albedo. Because the HadGEM2-ES and HadGEM2-CC are the only two models in PMIP3 with

dynamic vegetation simulation for the MH, we thus focused on them to examine the variations in vegetation fraction in the simulations. The main vegetation changes during the MH demonstrated by HadGEM2-ES are increased tree coverage (~15%) and a decreased bare soil fraction (~6%), while HadGEM2-CC depicts a ~3% decrease in tree fraction and a ~1% increase in bare soil (Fig. S9). We made a rough calculation of albedo variance caused solely by vegetation change for both two models and for our reconstruction, based on the area fraction and albedo value of each vegetation type (Betts, 2000; Bonfils et al., 2001; Oguntunde et al., 2006; Bonan, 2008).

Reconstruction showed vegetation changes during the MH leading to a ~1.8% decrease in albedo when snow-free, with a much larger impact (~4.2% decrease) when snow-covered. The results from HadGEM2-ES are highly consistent with the albedo changes from the reconstruction, featuring a ~1.4% (~6.5%) decrease without (with) snow, while HadGEM2-CC produces an increased albedo value during the MH (~0.22% for snow-free, ~1.9% with snow-cover), depending on its vegetation simulation. Two ideas could be inferred from this calculation, 1) HadGEM2-ES is much better in simulating the MH vegetation changes than HadGEM2-CC. 2) the failure by models to capture these vegetation changes will result in a much larger impact on winter albedo (with snow) than summer albedo (without snow).

These surface albedo changes due to vegetation changes could have a cumulative effect on the regional climate by modifying the radiative fluxes. For instance, the spread of trees into the grassland biome in the northeast during the MH, revealed by the reconstruction in our study, should act as a positive feedback to climate warming by increasing the surface net shortwave radiation associated with reductions in albedo due to taller and darker canopies (Chapin et al., 2005). Previous studies show that cloud and surface albedo feedbacks on radiation are major drivers of differences between model outputs for past climates. Moreover, the land surface feedback shows large disparities among models (Braconnot and Kageyama, 2015).

We used a simplified approach (Taylor et al., 2007) to quantify the feedbacks and to compare model behavior for the MH, thus justifying the focus on surface albedo and atmospheric scattering (mainly accounting for cloud change). Surface albedo and cloud change are calculated using the simulated incoming and outgoing radiative fluxes at the Earth's surface and at the top of atmosphere (TOA), based on data for the last 30 years averaged from all models. Using this framework, we quantified the effect of changes in albedo on the net shortwave flux at TOA (Braconnot and Kageyama, 2015), and further investigated the relationship between these changes and temperature change. Fig.7 shows that most models produced a negative cloud cover and surface albedo feedback on the annual mean shortwave radiative forcing. Concerning seasonal change, the shortwave cloud and surface feedback in most models tend to counteract the insolation forcing during the boreal summer, while they enhance the solar forcing during winter. A strong positive correlation between albedo feedback and temperature change is depicted, with a large spread in the models owing to the difference in albedo in the 13 models. In particular, CNRM-CM5 and HadGEM2-ES capture higher values of cloud and surface albedo feedback, which could be the reason for the reversal of the decreased annual temperature seen in other models (Fig. 3d).

However, the vegetation patterns produced by BIOME4 in Fig. 5 are not used in PMIP3 experiment setup, it's actually determined by the input variables from models. To better quantify the vegetation-climate feedback, two experiments were conducted in CESM version 1.0.5, including a mid-Holocene (MH) experiment (6 ka) with original vegetation setting (prescribed as PI vegetation for MH) and a MH experiment with reconstructed vegetation (6 ka\_VEG). Fig. 8 shows the climate anomalies (6 ka\_VEG minus 6 ka) between two simulations, for both annual and seasonal scale. For temperature, it's clear that the 6 ka\_VEG simulation reproduces the warmer annual ( $\sim 0.3$  K on average) and winter temperature ( $\sim 0.6$  K on average), especially the winter temperature. For precipitation, the reconstructed vegetation

leads to higher annual and seasonal precipitation, which can also reconcile the discrepancy of increase amplitude for precipitation during MH between model-data (data reproduced larger amplitude than model, revealed by our study). So the mismatch between model-data in MH vegetation could partly account for the discrepancy of climate due to the interaction between vegetation and climate through radiative and hydrological forcing with albedo. These results pinpoint the value of building a new generation of models able to capture not only the atmosphere and ocean response, but also the non-linear responses of vegetation and hydrology. Moreover, besides the vegetation influence, to which extent this model-data discrepancy is related to rough topography, soil type and other possible factors should be investigated in the future work.

Besides the uncertainties in the models, IVM, from the data perspective, relies heavily on BIOME4, and since BIOME4 is a global vegetation model, it is possible that the spatial robustness of regional reconstruction could be less than that of global reconstruction due to the failure to simulate local features (Bartlein et al., 2011). China, located in the Asian monsoon area, has some specialized vegetation types which call for an improved ability to simulate regional vegetation in BIOME4. Moreover, the output of the model is not directly compared to the pollen data, the conversion of BIOME4 biomes to pollen biomes by the transfer matrix may add the source of uncertainty in reconstruction. All these bias in reconstruction should also be considered in the discrepancy between model-data for climate change during MH over China. Of course, more reconstruction studies using multiple proxies and reliable methods are also required to narrow the discrepancies between data and model results.

#### **Data availability**

The PMIP3 output is publicly available at website (<http://pmip3.lsce.ipsl.fr/>) by the climate modelling groups, the 65 pollen biomization results are provided by Members of China

Quaternary Pollen Data Base, Table 1 shows the information (including references) of the 91 collected pollen records and 3 original ones in our study. All the reconstructed climate values at each pollen site from IVM are provided in Table S4. The full datasets of pollen are available upon the request to the corresponding author.

#### **Author contribution**

Yating Lin carried out the model-data analysis and prepared for the first manuscript, Gilles Ramstein contributed a lot to the paper's structure and content, Haibin Wu provided the reconstruction results from IVM and contributed the paper's structure and content. Raj Rani-Singh conducted the BIOME4 simulations. Pascale Braconnot, Masa Kegeyama and Zhengtang Guo contributed great ideas on model-data comparison work. Qin Li and Yunli Luo provided pollen data. All co-authors helped to improve the paper.

#### **Competing interest**

The authors declare no competing interests.

#### **Acknowledgements**

We acknowledge the World Climate Research Program's Working Group on Coupled Modelling, which is responsible for PMIP/CMIP, and we thank the climate modelling groups for producing and making available their model output. This research was funded by the Sino-French Caiyuanpei Program, the National Basic Research Program of China (Grant no. 2016YFA0600504), the National Natural Science Foundation of China (Grant nos. 41572165, 41690114, and 41125011), and the Bairen Programs of the Chinese Academy of Sciences.

## References

- An, C., Zhao, J., Tao, S., Lv, Y., Dong, W., Li, H., Jin, M., and Wang, Z.: Dust variation recorded by lacustrine sediments from arid Central Asia since ~ 15 cal ka BP and its implication for atmospheric circulation, *Quaternary Research*, 75, 566-573, 2011.
- Bao, Q., Lin, P., Zhou, T., Liu, Y., Yu, Y., Wu, G., He, B., He, J., Li, L., Li, J., Li, Y., Liu, H., Qiao, F., Song, Z., Wang, B., Wang, J., Wang, P., Wang, X., Wang, Z., Wu, B., Wu, T., Xu, Y., Yu, H., Zhao, W., Zheng, W., and Zhou, L.: The flexible global oceanatmosphere-land system model, spectral version 2: FGOALS-s2. *Adv. Atmos. Sci.*, 30, 561-576, 2013.
- Bartlein, P. J., Harrison, S. P., Brewer, S., Connor, S., Davis, B. A. S., Gajewski, K., Guiot, J., Harrison-Prentice, T. I., Henderson, A., Peyron, O., Prentice, I. C., Scholze, M., Seppä H., Shuman, B., Sugita, S., Thompson, R. S., Viau, A. E., Williams, J., and Wu, H.B.: Pollen-based continental climate reconstructions at 6 and 21ka: a global synthesis, *Climate Dynamics*, 37, 775-802, 2011.
- Berger, A.: Long-Term Variations of Daily Insolation and Quaternary Climatic Changes, *Journal of the Atmospheric Sciences*, 35, 2362-2367, 1978.
- Betts, R. A.: Offset of the potential carbon sink from boreal forestation by decreases in surface albedo, *Nature*, 408, doi: 10.1038/nature.35041545, 2000.
- Bigelow, N. H., Brubaker, L. B., Edwards, M. E., Harrison, S. P., Prentice, I. C., Anderson, P. M., Andreev, A. A., Bartlein, P. J., Christensen, T. R., Cramer, W., Kaplan, J. O., Lozhkin, A. V., Matveyeva, N. V., Murray, D. F., David McGuire, A., Razzhivin, V. Y., Ritchie, J. C., Smith, B., Walker, A. D., Gajewski, K., Wolf, V., Holmqvist, B. H., Igarashi, Y., Kremenetskii, K., Paus, A., Pisaric, M. F. J., and Volkova, V. S.: Climate change and Arctic

ecosystems: 1. Vegetation changes north of 55 °N between the last glacial maximum,  
mid-Holocene and present, *Journal of Geophysical Research*, 108, 1-25, 2003.

Bonan, G. B.: Forests and Climate Change: Forcings, Feedbacks, and the Climate Benefits of  
Forests, *Science*, 320, 1444-1449, 2008.

Bonfils, C., de Noblet-Ducoudré N, Braconnot, P., and Joussaume, S.: Hot Desert Albedo and  
Climate Change: Mid-Holocene Monsoon in North Africa, *Journal of Climate*, 14,  
3724–3737, 2001.

Braconnot, P., and Kageyama, M.: Shortwave forcing and feedbacks in Last Glacial Maximum  
and Mid-Holocene PMIP3 simulations, *Philosophical Transactions of the Royal Society A:  
Mathematical, Physical and Engineering Sciences*, 373, 2054-2060, 2015.

Braconnot, P., Harrison, S. P., Kageyama, M., Bartlein, P. J., Masson-Delmotte, V., Abe-Ouchi,  
A., Otto-Bliesner, B., and Zhao, Y.: Evaluation of climate models using palaeoclimatic data:  
*Nature Climate Change*, 2, 417-421, 2012.

Braconnot, P., Otto-Bliesner, B., Harrison, S., Joussaume, S., Peterchmitt, J. Y., Abe-Ouchi, A.,  
Crucifix, M., Driesschaert, E., Fichefet, T., Hewitt, C. D., Kageyama, M., Kitoh, A., Laine,  
A., Loutre, M. F., Marti, O., Merkel, U., Ramstein, G., Valdes, P., Weber, S. L., Yu, Y., and  
Zhao, Y.: Results of PMIP2 coupled simulations of the Mid-Holocene and Last Glacial  
Maximum-Part 1: experiments and large-scale features, *Clim. Past*, 3, 261-277, 2007a.

Braconnot, P., Otto-Bliesner, B., Harrison, S., Joussaume, S., Peterschmitt, J. Y., Abe-Ouchi,  
A., Crucifix, M., Driesschaert, E., Fichefet, T., Hewitt, C. D., Kageyama, M., Kitoh, A.,  
Loutre, M. F., Marti, O., Merkel, U., Ramstein, G., Valdes, P., Weber, L., Yu, Y., and Zhao,  
Y.: Results of PMIP2 coupled simulations of the Mid-Holocene and Last Glacial  
Maximum-Part 2: feedbacks with emphasis on the location of the ITCZ and mid- and high  
latitudes heat budget, *Clim. Past*, 3, 279-296, 2007b.

482 Cai, Y.: Study on environmental change in Zoige Plateau: Evidence from the vegetation  
 483 record since 24000a B.P., Chinese Academy of Geological Sciences, Mater Dissertation,  
 484 2008 (in Chinese).

485 Caudill, M., Bulter, C.: Understanding Neural Networks, Basic Networks, 1, 309, 1992.

486 Chapin, F. S., Sturm, M., Serreze, M. C., McFadden, J. P., Key, J. R., Lloyd, A. H.,  
 487 McGuire, A. D., Rupp, T. S., Lynch, A. H., Schimel, J. P., Beringer, J., Chapman, W. L.,  
 488 Epstein, H. E., Euskirchen, E. S., Hinzman, L. D., Jia, G., Ping, C.L., Tape, K. D.,  
 489 Thompson, C. D. C., Walker, D. A., and Welker, J. M.: Role of Land-Surface Changes in  
 490 Arctic Summer Warming, *Science*, 310, 657-660, 2005.

491 Chen, F., Cheng, B., Zhao, Y., Zhu, Y., and Madsen, D. B.: Holocene environmental change  
 492 inferred from a high-resolution pollen record, Lake Zhuyeze, arid China, *The Holocene*, 16,  
 493 675-684, 2006.

494 Chen, F., Xu, Q., Chen, J., Birks, H. J. B., Liu, J., Zhang, S., Jin, L., An, C., Telford, R. J., Cao,  
 495 X., Wang, Z., Zhang, X., Selvaraj, K., Lu, H., Li, Y., Zheng, Z., Wang, H., Zhou, A., Dong,  
 496 G., Zhang, J., Huang, X., Bloemendal, J., and Rao, Z.: East Asian summer monsoon  
 497 precipitation variability since the last deglaciation, *Scientific Reports*, 5, 11186, 2015.

498 Cheng, B., Chen, F., and Zhang, J.: Palaeovegetational and Palaeoenvironmental Changes in  
 499 Gonghe Basin since Last Deglaciation, *Acta Geographica Sinica*, 11, 1336-1344, 2010 (in  
 500 Chinese).

501 Cheng, H., Edwards, R. L., Sinha, A., Spötl, C., Yi, L., Chen, S., Kelly, M., Kathayat, G., Wang,  
 502 X., Li, X., Kong, X., Wang, Y., Ning, Y., and Zhang, H.: The Asian monsoon over the past  
 503 640,000 years and ice age terminations, *Nature*, 534, 640, 2016.

504 Cheng, Y.: Vegetation and climate change in the north-central part of the Loess Plateau since  
505 26,000 years, China University of Geosciences, Master Dissertation, 2011 (in Chinese).

506 Collins, W. J., Bellouin, N., Doutriaux-Boucher, M., Gedney, N., Halloran, P., Hinton, T.,  
507 Hughes, J., Jones, C.D., Joshi, M., Liddicoat, S., Martin, G., O'Connor, F., Rae, J., Senior,  
508 C., Sitch, S., Totterdell, I., Wiltshire, A., and Woodward, S.: Development and evaluation  
509 of an Earth-system model—HadGEM2, *Geoscientific Model Development*, 4, 1051–1075,  
510 2011.

511 Cui, M., Luo, Y., and Sun, X.: Paleovegetational and paleoclimatic changed in Ha'ni Lake,  
512 Jilin since 5ka BP, *Marine Geology & Quaternary Geology*, 26, 117-122, 2006 (in  
513 Chinese).

514 Davis, B. A. S., Brewer, S., Stevenson, A. C., and Guiot, J.: The temperature of Europe during  
515 the Holocene reconstructed from pollen data, *Quaternary Science Reviews*, 22, 1701-1716,  
516 2003.

517 Dufresne, J.L., Foujols, M.A., Denvil, S., Caubel, A., Marti, O., Aumont, O., Balkanski, Y.,  
518 Bekki, S., Bellenger, H., Benshila, R., Bony, S., Bopp, L., Braconnot, P., Brockmann, P.,  
519 Cadule, P., Cheruy, F., Codron, F., Cozic, A., Cugnet, D., Noblet, N., Duvel, J.P., Ethe, C.,  
520 Fairhead, L., Fichefet, T., Flavoni, S., Friedlingstein, P., Grandpeix, J.Y., Guez, L.,  
521 Guilyardi, E., Hauglustaine, D., Hourdin, F., Idelkadi, A., Ghattas, J., Joussaume, S.,  
522 Kageyama, M., Krinner, G., Labetoulle, S., Lahellec, A., Lefevre, M.-F., Lefevre, F.,  
523 Levy, C., Li, Z.X., Lloyd, J., Lott, F., Madec, G., Mancip, M., Marchand, M., Masson, S.,  
524 Meurdesoif, Y., Mignot, J., Musat, I., Parouty, S., Polcher, J., Rio, C., Schulz, M.,  
525 Swingedouw, D., Szopa, S., Talandier, C., Terray, P., Viovy, N., and Vuichard, N.:  
526 Climate change projections using the IPSL-CM5 Earth system model: from CMIP3 to  
527 CMIP5, *Climate Dynamics*, 40, 2123-2165, 2013.

528 Farrera, I., Harrison, S. P., Prentice, I. C., Ramstein, G., Guiot, J., Bartlein, P. J., Bonnefille, R.,  
 529 Bush, M., Cramer, W., von Grafenstein, U., Holmgren, K., Hooghiemstra, H., Hope, G.,  
 530 Jolly, D., Lauritzen, S. E., Ono, Y., Pinot, S., Stute, M., and Yu, G.: Tropical climates at the  
 531 Last Glacial Maximum: a new synthesis of terrestrial palaeoclimate data. I. Vegetation,  
 532 lake-levels and geochemistry, *Climate Dynamics*, 15, 823-856, 1999.

533 Fischer, N., and Jungclaus, J. H.: Evolution of the seasonal temperature cycle in a transient  
 534 Holocene simulation: orbital forcing and sea-ice, *Clim. Past*, 7, 1139-1148, 2011.

535 Ganopolski, A., Kubatzki, C., Claussen, M., Brovkin, V., and Petoukhov, V.: The Influence of  
 536 Vegetation-Atmosphere-Ocean Interaction on Climate During the Mid-Holocene, *Science*,  
 537 280, 1916-1919, 1998.

538 Gent, P.R., Danabasoglu, G., Donner, L.J., Holland, M.M., Hunke, E.C., Jayne, S.R.,  
 539 Lawrence, D.M., Neale, R.B., Rasch, P.J., Vertenstein, M., Worley, P.H., Yang, Z., and  
 540 Zhang, M.: The community climate system model version 4, *Journal of Climate*, 24,  
 541 4973-4991, 2011.

542 Giorgetta, M.A., Jungclaus, J., Reick, C.H., Legutke, S., Bader, J., Bottinger, M., Brovkin, V.,  
 543 Crueger, T., Esch, M., Fieg, K., Glushak, K., Gayler, V., Haak, H., Hollweg, H.D., Ilyina,  
 544 T., Kinne, S., Kornblueh, L., Matei, D., Mauritsen, T., Mikolajewicz, U., Mueller, W.,  
 545 Notz, D., Pithan, F., Raddatz, T.J., Rast, S., Redler, R., Roeckner, E., Schmidt, H., Schnur,  
 546 R., Segschneider, J., Six, K.D., Stockhause, M., Timmreck, C., Wegner, J., Widmann, H.,  
 547 Wieners, K.H., Claussen, M., Marotzke, J., and Stevens, B.: Climate and carbon cycle  
 548 changes from 1850 to 2100 in MPI-ESM simulations for the Coupled Model  
 549 Intercomparison Project phase 5, *Journal of Advances in Modeling Earth System*, 5,  
 550 572-597, 2013.

551 Gong, X.: High-resolution paleovegetation reconstruction from pollen in Jiachuanyuan, Baoji,  
552 Capital Normal University, Master Dissertation, 2006 (in Chinese).

553 Guiot, J., and C. Goeury.: PPPBASE, a software for statistical analysis of paleoecological and  
554 paleoclimatological data, *Dendrochronologia*, 14, 295-300, 1996.

555 Guiot, J., Torre, F., Jolly, D., Peyron, O., Boreux, J. J., and Cheddadi, R.: Inverse vegetation  
556 modeling by Monte Carlo sampling to reconstruct palaeoclimates under changed  
557 precipitation seasonality and CO<sub>2</sub> conditions: application to glacial climate in  
558 Mediterranean region, *Ecological Modelling*, 127, 119-140, 2000.

559 Guo, L., Feng, Z., Lee, X., Liu, L., and Wang, L.: Holocene climatic and environmental  
560 changes recorded in Baahar Nuur Lake in the Ordos Plateau, Southern Mongolia of china,  
561 *Chinese Science Bulletin*, 52, 959-966, 2007.

562 Hargreaves, J. C., Annan, J. D., Ohgaito, R., Paul, A., and Abe-Ouchi, A.: Skill and reliability  
563 of climate model ensembles at the Last Glacial Maximum and mid-Holocene, *Clim. Past*, 9,  
564 811-823, 2013.

565 Harrison, S. P., Bartlein, P. J., Brewer, S., Prentice, I. C., Boyd, M., Hessler, I., Holmgren, K.,  
566 Izumi, K., and Willis, K.: Climate model benchmarking with glacial and mid-Holocene  
567 climates, *Climate Dynamics*, 43, 671-688, 2014.

568 Harrison, S. P., Bartlein, P. J., K., Izumi, Li, G., Annan, J., Hargreaves, J., Braconnot, P., and  
569 Kageyama, M.: Evaluation of CMIP5 paleo-simulations to improve climate projections,  
570 *Nature Climate Change*, 5, 735-743, 2015.

571 Harrison, S., P., Braconnot, P., Hewitt, C., and Stouffer, R., J.: Fourth International Workshop  
572 of the Palaeoclimate Modelling Intercomparison Project (PMIP): Lauching PMIP2 Phase II,  
573 *EOS*, 83, 447-457, 2002.

574 Herzsuh, U., Kramer, A., Mischke, S., and Zhang, C.: Quantitative climate and vegetation  
 575 trends since the late glacial on the northeastern Tibetan Plateau deduced from Koucha  
 576 Lake pollen spectra, *Quaternary Research*, 71, 162-171, 2009.

577 Herzsuh, U., Kürschner, H., and Mischke, S.: Temperature variability and vertical  
 578 vegetation belt shifts during the last ~50,000 yr in the qilian mountains (ne margin of the  
 579 tibetan plateau, china), *Quaternary Research*, 66, 133-146, 2006.

580 Huang, C., Elis, V. C., and Li, S.: Holocene environmental changes of Western and Northern  
 581 Qinghai-Xizang Plateau Based on pollen analysis, *Acta Micropalaeontologica Sinica*, 4,  
 582 423-432, 1996 (in Chinese).

583 Jeffrey, S.J., Rotstajn, L.D., Collier, M., Dravitzki, S.M., Hamalainen, C., Moeseneder, C.,  
 584 Wong, K.K., and Syktus, J.I.: Australia' s CMIP5 submission using the CSIRO-Mk3.6  
 585 model, *Aust. Meteorol. Oceanogr. J.*, 63, 1-13, 2013.

586 Jia, L., and Zhang, Y.: Studies on Palynological assemblages and paleoenvironment of late  
 587 Quaternary on the east margin of the Chanjiang (Yangtze) river delta, *Acta*  
 588 *Micropalaeontologica Sinica*, 23, 70-76, 2006 (in Chinese).

589 Jiang, D., Lang, X., Tian, Z., and Wang, T.: Considerable Model–Data Mismatch in  
 590 Temperature over China during the Mid-Holocene: Results of PMIP Simulations, *Journal*  
 591 *of Climate*, 25, 4135-4153, 2012.

592 Jiang, Q., and Piperno., R. D.: Environmental and archaeological implications of a late  
 593 Quaternary palynological sequence, Poyang lake, Southern China, *Quaternary Research*,  
 594 52, 250-258, 1999.

595 Jiang, W., Guiot, J., Chu, G., Wu, H., Yuan, B., Hatt é C., and Guo, Z.: An improved  
596 methodology of the modern analogues technique for palaeoclimate reconstruction in arid  
597 and semi-arid regions, *Boreas*, 39, 145-153, 2010.

598 Jiang, W., Guo, Z., Sun, X., Wu, H., Chu, G., Yuan, B., Hatte, C., and Guiot, J.:  
599 Reconstruction of climate and vegetation changes of lake bayanchagan (inner mongolia):  
600 holocene variability of the east asian monsoon. *Quaternary Research*, 65, 411-420, 2006.

601 Jiang, W., Leroy, S. G., Ogle, N., Chu, G., Wang, L., and Liu, J.: Natural and authropogenic  
602 forest fires recorded in the Holocene pollen record from a Jinchuan peat bog, northeastern  
603 China, *Palaeogeography, Palaeoclimatology, Palaeoecology*, 261, 47-57, 2008.

604 Joussaume, S., and Taylor, K. E.: Status of the Paleoclimate Modeling Intercomparison Project,  
605 *Proc. 1<sup>st</sup> Int. AMIP Scientific Conf*, 425-430, 1995.

606 Joussaume, S., Taylor, K. E., Braconnot, P., Mitchell, J. F. B., Kutzbach, J. E., Harrison, S. P.,  
607 Prentice, I. C., Broccoli, A. J., Abe-Ouchi, A., Bartlein, P. J., Bonfils, C., Dong, B., Guiot,  
608 J., Herterich, K., Hewitt, C. D., Jolly, D., Kim, J. W., Kislov, A., Kitoh, A., Loutre, M. F.,  
609 Masson, V., McAvaney, B., McFarlane, N., de Noblet, N., Peltier, W. R., Peterschmitt, J. Y.,  
610 Pollard, D., Rind, D., Royer, J. F., Schlesinger, M. E., Syktus, J., Thompson, S., Valdes, P.,  
611 Vettoretti, G., Webb, R. S., Wyputta, U.: Monsoon changes for 6000 years ago: Results of  
612 18 simulations from the Paleoclimate Modeling Intercomparison Project (PMIP),  
613 *Geophysical Research Letters*, 26, 856-862, 1999.

614 Kaplan, J. O., Bigelow, N. H., Bartlein, P. J., Christensen, T. R., Cramer, W., Harrison, S. P.,  
615 Matveyeva, N. V., McGuire, A. D., Murray, D. F., Prentice, I. C., Razzhivin, V. Y., Smith,  
616 B., Anderson, P. M., Andreev, A. A., Brubaker, L. B., Edwards, M. E., and Lozhkin, A. V.:  
617 Climate change and Arctic ecosystems II: Modeling, palaeodata-model comparisons, and  
618 future projections, *Journal of Geophysical Research: Atmospheres*, 108, 2003.

619 Kohfeld, K. E. and Harrison, S.: How well we can simulate past climates? Evaluating the  
620 models using global palaeoenvironmental datasets, *Quaternary Science Reviews*, 19,  
621 321-346, 2000.

622 Kong, Z., Xu, Q., Yang, X., Sun, L., Liang, W.: Analysis of sporopollen assemblages of  
623 Holocene alluvial deposits in the Yinmahe River Basin, Hebei Province, and preliminary  
624 study on temporal and spatial changes of vegetation, *Acta Phytocologica Sinica*, 24, 724,  
625 2000 (in Chinese).

626 Lee, Y., and Liew, M.: Pollen stratigraphy, vegetation and environment of the last glacial and  
627 Holocene-A record from Toushe Basin, central Taiwan,  
628 *Palaeogeography, Palaeoclimatology, Palaeoecology*, 287, 58-66, 2010.

629 Li, B., and Sun, J.: Vegetation and climate environment during Holocene in Xi'an region of  
630 Loess Plateau, China, *Marine Geology and Quaternary Geology*, 3, 125-132, 2005 (in  
631 Chinese).

632 Li, C., Wu, Y., and Hou, X.: Holocene vegetation and climate in Northeast China revealed  
633 from Jingbo Lake sediment, *Quaternary International*, 229, 67-73, 2011.

634 Li, L., Lin, P., Yu, Y., Wang, B., Zhou, T., Liu, L., Liu, J., Bao, Q., Xu, S., Huang, W., Xia,  
635 K., Pu, Y., Dong, L., Shen, S., Liu, Y., Hu, N., Liu, M., Sun, W., Shi, X., Zheng, W., Wu,  
636 B., Song, M., Liu, H., Zhang, X., Wu, G., Xue, W., Huang, X., Yang, G., Song, Z., and  
637 Qiao, F.: The flexible global ocean-atmosphere-land system model, Grid-point Version 2:  
638 FGOALS-g2, *Adv. Atmos. Sci.*, 30, 543-560, 2013.

639 Li, Q., Wu, H., Guo, Z., Yu, Y., Ge, J., Wu, J., Zhao, D., and Sun, A.: Distribution and  
640 vegetation reconstruction of the deserts of northern China during the mid-Holocene,  
641 *Geophysical Research Letter*, 41, 2184-5191, 2014.

- 642 Li, X., and Liu, J.: Holocene vegetational and environmental changes at Mt. Luoji, Sichuan,  
643 *Acta Geographica Sinica*, 1, 44-51, 1988 (in Chinese).
- 644 Li, X., Zhao, K., Dodson, J., and Zhou, X.: Moisture dynamics in central Asia for the last  
645 15 kyr: new evidence from Yili Valley, Xinjiang, NW China, *Quaternary Science*  
646 *Reviews*, 30, 23-34, 2011.
- 647 Li, X., Zhou, J., and Dodson, J.: The vegetation characteristics of the ‘yuan’ area at yaoxian  
648 on the loess plateau in china over the last 12 000 years. *Review of Palaeobotany &*  
649 *Palynology*, 124, 1-7, 2003.
- 650 Li, X., Zhou, W., An, Z., and Dodson, J.: The vegetation and monsoon variations at the  
651 desert-loess transition belt at Midiwan in northern China for the last 13 ka, *Holocene*, 13,  
652 779-784, 2003.
- 653 Li, Z., Hai, Y., Zhou, Y., Luo, R., Zhang, Q.: Pollen Component of Lacustrain Deposit and its  
654 Palaeo-environment Significance in the Downstream Region of Urumqi Riever since  
655 30Ka BP, *Arid Land Geography*, 24, 201-205, 2001 (in Chinese).
- 656 Liew, M., Huang, Y., and Kuo, M.: Pollen stratigraphy, vegetation and environment of the last  
657 glacial and Holocene-A record from Toushe Basin, central Taiwan, *Quaternary*  
658 *International*, 14, 16-33, 2006.
- 659 Liu, H., Tang, X., Sun, D., and Wang, K.: Palynofloras of the Dajiuhu Basin in Shennongjia  
660 mountains during the last 12.5 ka, *Acta Micropalaeontologica Sinica*, 1, 101-109, 2001 (in  
661 Chinese).
- 662 Liu, J., Zhao, S., Cheng, J., Bao, J., and Yin, G.: A study of vegetation and climate evolution  
663 since the Holocene near the banks of the Qiangtang River in Hangzhou Bay, *Earth*  
664 *Science Frontiers*, 5, 235-245, 2007 (in Chinese).

665 Liu, Y., Liu, J., and Han, J.: Pollen record and climate changing since 12.0ka B. P. in  
 666 Erlongwan Maar Lake, Jilin province, Journal of Jilin University (Earth Science Edition),  
 667 39, 93-98, 2009 (in Chinese).

668 Liu, Y., Zhang, S., Liu, J., You, H., and Han, J.: Vegetation and environment history of  
 669 erlongwan Maar lake during the late Pleistocene on pollen record, Acta  
 670 Micropalaeontologica Sinica, 25, 274-280, 2008 (in Chinese).

671 Liu, Z., Harrison, S. P., Kutzbach, J. E., and Otto-Bliesner, B.: Global monsoons in the  
 672 mid-Holocene and oceanic feedback, Climate Dynamics, 22, 157-182, 2004.

673 Liu, Z., Wang, Y., Gallimore, R., Gasse, F., Johnson, T., deMenocal, P., Adkins, J., Notaro, M.,  
 674 Prentice, I.C., Kutzbach, J., Jacob, R., Behling, P., Wang, L., and Ong, E.: Simulating the  
 675 transient evolution and abrupt change of Northern Africa atmosphere–ocean–terrestrial  
 676 ecosystem in the Holocene, Quaternary Science Reviews, 26, 1818-1837, 2007.

677 Liu, Z., Zhu, J., Rosenthal, Y., Zhang, X., Otto-Bliesner, B. L., Timmermann, A., Smith, R. S.,  
 678 Lohmann, G., Zheng, W., and Elison Timm, O.: The Holocene temperature conundrum,  
 679 Proceedings of the National Academy of Sciences, 111, E3501-E3505, 2014.

680 Lu, H., Wu, N., Liu, K.-b., Zhu, L., Yang, X., Yao, T., Wang, L., Li, Q., Liu, X., Shen, C., Li, X.,  
 681 Tong, G., and Jiang, H.: Modern pollen distributions in Qinghai-Tibetan Plateau and the  
 682 development of transfer functions for reconstructing Holocene environmental changes,  
 683 Quaternary Science Reviews, 30, 947-966, 2011.

684 Luo, H.: Characteristics of the Holocene sporopollen flora and climate change in the Coqên  
 685 area, Tibet, Chengdu University of Technology, Master Dissertation, 2008 (in Chinese).

686 Mann, M. E., Zhang, Z., Hughes, M. K., Bradley, R. S., Miller, S. K., Rutherford, S., and Ni, F.:  
 687 Proxy-based reconstructions of hemispheric and global surface temperature variations over

688 the past two millennia, *Proceedings of the National Academy of Sciences*, 105,  
689 13252-13256, 2008.

690 Marchant, R., Cleef, A., Harrison, S. P., Hooghiemstra, H., Markgraf, V., Van Boxel, J., Ager,  
691 T., Almeida, L., Anderson, R., Baied, C., Behling, H., Berrio, J. C., Burbidge, R., Bjorck,  
692 S., Byrne, R., Bush, M., Duivenvoorden, J., Flenley, J., De Oliveira, P., Van Gee, B., Graf,  
693 K., Gosling, W. D., Harbele, S., Van Der Hammen, T., Hansen, B., Horn, S., Kuhry, P.,  
694 Ledru, M. P., Mayle, F., Leyden, B., Lozano-Garcia, S., Melief, A. M., Moreno, P., Moar,  
695 N. T., Prieto, A., Van Reenen, G., Salgado-Labouriau, M., Schabitz, F., Schreve-Brinkman,  
696 E. J., and Wille, M.: Pollen-based biome reconstructions for Latin America at 0, 6000 and  
697 18 000 radiocarbon years ago, *Climate of the Past*, 5, 725-767, 2009.

698 Marcott, S., Shakun, J., U Clark, P., and Mix, A.: A Reconstruction of Regional and Global  
699 Temperature for the Past 11,300 Years, *Science*, 1198-1201, 2013.

700 Mauri, A., Davis, B. A. S., Collins, P. M., and Kaplan, J. O.: The climate of Europe during the  
701 Holocene: a gridded pollen-based reconstruction and its multi-proxy evaluation,  
702 *Quaternary Science Reviews*, 112, 109-127, 2015.

703 Ma, Y., Zhang, H., Pachur, H., Wunnemann, B., Li, J., and Feng, Z.: Late Glacial and  
704 Holocene vegetation history and paleoclimate of the Tengger Desert, northwestern China,  
705 *Chinese Science Bulletin*, 48, 1457-1463, 2003.

706 Members of the China Quaternary Pollen Data Base.: Pollen-based Biome reconstruction at  
707 Middle Holocene (6ka BP) and Last Glacial Maximum (18ka BP) in China, *Acta Botanica*  
708 *Sinica*, 42, 1201-1209, 2000.

709 Members, M. P.: Constraints on the magnitude and patterns of ocean cooling at the Last Glacial  
710 Maximum, *Nature Geoscience*, 2, 127-130, 2009.

711 Meng, X., Zhu, D., Shao, Z., Han, J., Yu, J., Meng, Q., Lv, R., and Luo, P.: Paleoclimatic and  
 712 Plaeoenvironmental Evolution Since Holocene in the Ningwu Area, Shanxi Province, *Acta*  
 713 *Geologica Sinica*, 3, 316-323, 2007 (in Chinese).

714 Ni, J., Sykes, M. T., Prentice, I. C., and Cramer, W.: Modelling the vegetation of China using  
 715 the process-based equilibrium terrestrial biosphere model BIOME3, *Global Ecology and*  
 716 *Biogeography*, 9, 463-479, 2000.

717 Oguntunde, P. G., Ajayi, A. E., and Giesen, N.: Tillage and surface moisture effects on  
 718 bare-soil albedo of a tropical loamy sand, *Soil and Tillage Research*, 85, 107-114, 2006.

719 O'ishi, R., Abe - Ouchi, I. C. Prentice, and S. Sitch.: Vegetation dynamics and plant CO<sub>2</sub>  
 720 responses as positive feedbacks in a greenhouse world, *Geophysical Research Lettters*, v.  
 721 36, L11706, doi: 10.1029/2009GL038217, 2009.

722 Otto, J., T. Raddatz, M. Claussen, V. Brovkin, and V. Gayler.: Separation of  
 723 atmosphere-ocean-vegetation feedbacks and synergies for mid-Holocene climate,  
 724 *Geophysical Research Lettters*, 36, L09701, doi: 10.1029/2009GL037482, 2009.

725 Peyron, O., Guiot, J., Cheddadi, R., Tarasov, P., Reille, M., De Beaulieu, J.L., Bottema, S., and  
 726 Andrieu, Valerie. : Climatic reconstruction in Europe for 18,000 YR B.P. from pollen data,  
 727 *Quaternary Research*, 49, 183-196, 1998.

728 Peyron, O., Jolly, D., Bonnefille, R., Vincens, A., and Guiot, J.: Climate of East Africa 6000  
 729 <sup>14</sup>C Yr B.P. as Inferred from Pollen Data, *Quaternary Research*, 54, 90-101, 2000.

730 Pickett Elizabeth, J., Harrison Sandy, P., Hope, G., Harle, K., Dodson John, R., Peter Kershaw,  
 731 A., Colin Prentice, I., Backhouse, J., Colhoun Eric, A., D'Costa, D., Flenley, J., Grindrod, J.,  
 732 Haberle, S., Hassell, C., Kenyon, C., Macphail, M., Martin, H., Martin Anthony, H.,  
 733 McKenzie, M., Newsome Jane, C., Penny, D., Powell, J., Ian Raine, J., Southern, W.,

734 Stevenson, J., Sutra, J. P., Thomas, I., Kaars, S., and Ward, J.: Pollen-based reconstructions  
 735 of biome distributions for Australia, Southeast Asia and the Pacific (SEAPAC region) at 0,  
 736 6000 and 18,000 <sup>14</sup>C yr BP, *Journal of Biogeography*, 31, 1381-1444, 2004.

737 Prentice, I. C., Guiot, J., Huntley, B., Jolly, D., and Cheddadi, R.: Reconstructing biomes from  
 738 palaeoecological data: A general method and its application to European pollen data at 0  
 739 and 6 ka, *Climate Dynamics*, 12, 185-194, 1996.

740 Prentice, I. C., and Jolly, D.: Mid-Holocene and glacial-maximum vegetation geography of the  
 741 northern continents and Africa, *Journal of Biogeography*, 27, 507-519, 2001.

742 Schmidt, G.A., Annan, J.D., Bartlein, P.J., Cook, B.I., Guilyardi, E., Hargreaves, J.C.,  
 743 Harrison, S.P., Kageyama, M., Legrande, A.N., Konecky, B.L., Lovejoy, S., Mann, M.E.,  
 744 Masson-Delmotte, V., Risi, C., Thompson, D., Timmermann, A., and Yiou, P.: Using  
 745 palaeo-climate comparisons to constrain future projections in CMIP5, *Climate of the*  
 746 *Past*, 10, 221-250, 2014a.

747 Schmidt, G.A., Kelley, M., Nazarenko, L., Ruedy, R., Russell, G.L., Aleinov, I., Bauer, M.,  
 748 Bauer, S.E., Bhat, M.K., Bleck, R., Canuto, V., Chen, Y., Cheng, Y., Clune, T.L., Del  
 749 Genio, A., de Fainchtein, R., Faluvegi, G., Hansen, J.E., Healy, R.J., Kiang, N.Y., Koch,  
 750 D., Lacis, A.A., Legrande, A.N., Lerner, J., Lo, K.K., Matthews, E.E., Menon, S., Miller,  
 751 R.L., Oinas, V., Olosio, A.O., Perlwitz, J.P., Puma, M.J., Putman, W.M., Rind, D.,  
 752 Romanou, A., Sato, M., Shindell, D.T., Sun, S., Syed Rahman, A., Tausnev, N., Tsigaridis,  
 753 K., Under, N., Voulgarakis, A., Yao, M., and Zhang, J.: Configuration and assessment of  
 754 the GISS ModelE2 contributions to the CMIP5 archive, *Journal of Advances in Modeling*  
 755 *Earth Systems*, 6, 141-184, 2014b.

756 Shakun, J. D., Clark, P. U., He, F., Marcott, S. A., Mix, A. C., Liu, Z., Otto-Bliesner, B.,  
757 Schmittner, A., and Bard, E.: Global warming preceded by increasing carbon dioxide  
758 concentrations during the last deglaciation, *Nature*, 484, 49, 2012.

759 Shen, C., Liu, K., Tang, L., Overpeck, J. T.: Quantitative relationships between modern  
760 pollen rain and climate in the Tibetan Plateau, *Review of Palaeobotany and Palynology*,  
761 140, 61-77, 2006.

762 Shen, J., Jones, R. T., Yang, X., Dearing, J. A., and Wang, S.: The holocene vegetation  
763 history of lake Erhai, Yunnan province southwestern China: the role of climate and human  
764 forcings, *Holocene*, 16, 265-276, 2006.

765 Shen, J., Liu, X., Matsumoto, R., Wang, S., Yang, X., Tang, L., and Shen, C.: Multi-index  
766 high-resolution paleoclimatic evolution of sediments in Qinghai Lake since the late glacial  
767 period, *Science in China Series D: Earth Sciences*, 6, 582-589, 2004 (in Chinese).

768 Shu, J., Wang, W., and Chen, Y.: Holocene vegetation and environment changes in the NW  
769 Taihu Plain, Jiangsu Province, East China, *Acta Micropalaeontologica Sinica*, 2, 210-221,  
770 2007 (in Chinese).

771 Shu, Q., Xiao, J., Zhang, M., Zhao, Z., Chen, Y., and Li, J.: Climate Change in Northern  
772 Jiangsu Basin since the Last Interglacial: Geological Science and Technology Information,  
773 5, 59-64, 2008 (in Chinese).

774 Sun, A., and Feng, Z.: Holocene climate reconstructions from the fossil pollen record at Qigai  
775 nuur in the southern Mongolian Plateau, *The Holocene*, 23, 1391-1402, 2013.

776 Sun, L., Xu, Q., Yang, X., Liang, W., Sun, Z., and Chen, S.: Vegetation and environmental  
777 changes in the Xuanhua Basin of Hebei Province since Postglacial, *Journal of*  
778 *Geomechanics*, 4, 303-308, 2001 (in Chinese).

779 Sun, Q., Zhou, J., Shen, J., Cheng, P., Wu, F., and Xie, X.: Mid-Holocene environmental  
780 characteristics recorded in the sediments of the Bohai Sea in the northern environmental  
781 sensitive zone, *Science in China (Series D)*, 9, 838-849, 2006 (in Chinese).

782 Sun, X., and Xia, Z.: Paleoenvironment Changes Since Mid-Holocene Revealed by a  
783 Palynological Sequence from Sihenan Profile in Luoyang, Henan Province, *Acta*  
784 *Scientiarum Naturalium Universitatis Pekinensis*, 2, 289-294, 2005 (in Chinese).

785 Sun, X., Wang, F., and Sun, C.: Pollen-climate response surfaces of selected taxa from  
786 Northern China, *Science in China Series D-Earth Sciences*, 39, 486, 1996.

787 Swann, A. L., Fung, I. Y., Levis, S., Bonan, G. B., and Doney, S. C.: Changes in Arctic  
788 vegetation amplify high-latitude warming through the greenhouse effect, *Proceedings of*  
789 *the National Academy of Sciences*, 107, 1295-1300, 2010.

790 Sykes, M.T., Prentice, I.C., and Laarif, F.: Quantifying the impact of global climate change on  
791 potential natural vegetation, *Climatic Change*, 41, 37–52, 1999.

792 Tang, L., and An, C.: Holocene vegetation change and pollen record of drought events in the  
793 Loess Plateau, *Progress in Natural Science*, 10, 1371-1382, 2007 (in Chinese).

794 Tang, L., and Shen, C.: Holocene pollen records of the Qinghai-Xizang Plateau, *Acta*  
795 *Micropalaeontologica Sinica*, 4, 407-422, 1996 (in Chinese).

796 Tang, L., Shen, C., Kong, Z., Wang, F., and Liao, K.: Pollen evidence of climate during the  
797 last glacial maximum in Eastern Tibetan Plateau, *Journal of Glaciology*, 2, 37-44, 1998  
798 (in Chinese).

799 Tao, S., An, C., Chen, F., Tang, L., Wang, Z., Lv, Y., Li, Z., Zheng, T., and Zhao, J.:  
800 Vegetation and environment since the 16.7cal ka B.P. in Balikun Lake, Xinjiang, China,  
801 *Chinese Science Bulletin*, 11, 1026-1035, 2010 (in Chinese).

802 Taylor, K.E., Crucifix, M., Braconnot, P., Hewitt, C. D., Doutriaux. C., Broccoli, A. J., Mitchell,  
 803 J. F. B., Webb, M. J.: Estimating shortwave radiative forcing and response in climate  
 804 models, *J. Clim*, 20, 2530-2543, 2007.

805 Voldoire, A., Sanchez-Gomez, E., Salas y Melia, D., Decharme, B., Cassou, C., Senesi, S.,  
 806 Valcke, S., Beau, I., Alias, A., Chevallier, M., Deque, M., Deshayes, J., Douville, H.,  
 807 Fernandez, E., Madec, G., Maisonnave, E., Moine, M., Planton, S., Saint-Martin, D.,  
 808 Szopa, S., Tyteca, S., Alkama, R., Belamari, S., Braun, A., Coquart, L., and Chauvin, F.:  
 809 The CNRM-CM5.1 global climate model: description and basic evaluation, *Climate*  
 810 *Dynamics*, 40, 2091-2121, 2012.

811 Wang, H., Liu, H., Zhu, J., and Yin, Y.: Holocene environmental changes as recorded by  
 812 mineral magnetism of sediments from Anguli-nuur Lake, southeastern Inner Mongolia  
 813 Plateau, China, *Palaeogeography, Palaeoclimatology, Palaeoecology*, 285, 30-49, 2010.

814 Wang, H., Liu, H., Zhu, J., and Yin, Y.: Holocene environmental changes as recorded by  
 815 mineral magnetism of sediments from Anguli-nuur Lake, southeastern Inner Mongolia  
 816 Plateau, China, *Palaeogeography, Palaeoclimatology, Palaeoecology*, 285, 30-49, 2010.

817 Wang, S., Lv, H., and Liu, J.: Environmental characteristics of the early Holocene suitable  
 818 period revealed by the high-resolution sporopollen record of Huguangyan Lake, Chinese  
 819 *Science Bulletin*, 11, 1285-1291, 2007 (in Chinese).

820 Wang, X., Wang, J., Cao, L., Yang, J., Yang, X., Peng, Z., and Jin, G.: Late Quaternary  
 821 Pollen Records and Climate Significance in Guangzhou, *Acta Scientiarum Naturalium*  
 822 *Universitatis Sunyatseni*, 3, 113-121, 2010 (in Chinese).

823 Wang, X., Zhang, G., Li, W., Zhang, X., Zhang, E., and Xiao, X.: Environmental changes  
 824 during early-middle holocene from the sediment record of the chaohu lake, anhui province,  
 825 *Chinese Science Bulletin*, 53, 153-160, 2008.

826 Wang, X., Zhang, G., Li, W., Zhang, X., Zhang, E., and Xiao, X.: Environmental changes  
827 during early-middle holocene from the sediment record of the chaohu lake, anhui province,  
828 Chinese Science Bulletin, 53, 153-160, 2008.

829 Wang, Y., Wang, S., Jiang, F., and Tong, G.: Palynological records in Xipu section,  
830 Yangyuan, Journal of Geomechanics, 2, 171-175, 2003 (in Chinese).

831 Wang, Y., Wang, S., Zhao, Z., Qin, Y., Ma, Y., Sun, J., Sun, H., and Tian, M.: Vegetation and  
832 Environmental Changes in Hexiqten Qi of Inner Mongolia in the Past 16000 Years, Acta  
833 Geoscientica Sinica, 5, 449-453, 2005 (in Chinese).

834 Wang, Y., Zhao, Z., Qiao, Y., Wang, S., Li, C., and Song, L.: Paleoclimatic and  
835 paleoenvironmental evolution since the late glacial epoch as recorded by sporopollen from  
836 the Hongyuan peat section on the Zoigê Plateau, northern Sichuan, China, Geological  
837 Bulletin of China, 7, 827-832, 2006 (in Chinese).

838 Watanabe, S., Hajima, T., Sudo, K., Nagashima, T., Takemura, T., Okajima, H., Nozawa, T.,  
839 Kawase, H., Abe, M., Yokohata, T., Ise, T., Sato, H., Kato, E., Takata, K., Emori, S., and  
840 Kawamiya, M.: MIROC-ESM 2010: model description and basic results of  
841 CMIP5-20c3m experiments, Geoscientific Model Development, 4, 845-872, 2011.

842 Webb, T. III.: Global paleoclimatic data base for 6000 yr BP, Brown Univ., Providence, RI  
843 (USA). Dept. of Geological Sciences, DOE/EV/10097-6; Other: ON: DE85006628 United  
844 States Other: ON: DE85006628 NTIS, PC A08/MF A01. HEDB English, 1985.

845 Wen, R., Xiao, J., Chang, Z., Zhai, D., Xu, Q., Li, Y. and Itoh, S.: Holocene precipitation and  
846 temperature variations in the East Asian monsoonal margin from pollen data from Hulun  
847 Lake in northeastern Inner Mongolia, China, Boreas, 39, 262-272, 2010.

848 Wen, R., Xiao, J., Chang, Z., Zhai, D., Xu, Q., Li, Y. and Itoh, S.: Holocene precipitation and  
849 temperature variations in the East Asian monsoonal margin from pollen data from Hulun  
850 Lake in northeastern Inner Mongolia, China, *Boreas*, 39, 262-272, 2010.

851 Wischniewski, J., Mischke, S., Wang, Y., and Herzschuh, U.: Reconstructing climate  
852 variability on the northeastern Tibetan Plateau since the last Lateglacial – a multi-proxy,  
853 dual-site approach comparing terrestrial and aquatic signals, *Quaternary Science Reviews*,  
854 30, 82-97, 2011.

855 Wischniewski, J., Mischke, S., Wang, Y., and Herzschuh, U.: Reconstructing climate  
856 variability on the northeastern Tibetan Plateau since the last Lateglacial – a multi-proxy,  
857 dual-site approach comparing terrestrial and aquatic signals, *Quaternary Science Reviews*,  
858 30, 82-97, 2011.

859 Wohlfahrt, J., Harrison, S. P., and Braconnot, P.: Synergistic feedbacks between ocean and  
860 vegetation on mid- and high-latitude climates during the mid-Holocene, *Climate Dynamics*,  
861 22, 223-238, 2004.

862 Wu, H., Guiot, J., Brewer, S., and Guo, Z.: Climatic changes in Eurasia and Africa at the last  
863 glacial maximum and mid-Holocene: reconstruction from pollen data using inverse  
864 vegetation modeling, *Climate Dynamics*, 29, 211-229, 2007.

865 Wu, H., Luo, Y., Jiang, W., Li, Q., Sun, A., and Guo, Z.: Paleoclimate reconstruction from  
866 pollen data using inverse vegetation approach: Validation of model using modern data, 36,  
867 520-529 (in Chinese), 2016.

868 Wu, H., Ma, Y., Feng, Z., Sun, A., Zhang, C., Li, F., and Kuang, J.: A high resolution record  
869 of vegetation and environmental variation through the last ~25,000 years in the western  
870 part of the Chinese Loess Plateau, *Palaeogeography, Palaeoclimatology, Palaeoecology*,  
871 273, 191-199, 2009.

872 Xia, Y.: Preliminary study on vegetational development and climatic changes in the Sanjiang  
873 Plain in the last 12000 years, *Scientia Geographica Sinica*, 8, 241-249, 1988 (in Chinese).

874 Xia, Z., Chen, G., Zheng, G., Chen, F., and Han, J.: Climate background of the evolution from  
875 Paleolithic to Neolithic cultural transition during the last deglaciation in the middle  
876 reaches of the Yellow River, *Chinese Science Bulletin*, 47, 71-75, 2002.

877 Xiao, J., Lv, H., Zhou, W., Zhao, Z., and Hao, R.: Pollen Vegetation and Environmental  
878 Evolution of the Great Lakes in Jiangxi Province since the Last Glacial Maximum,  
879 *Science in China (Series D)*, 6, 789-797, 2007 (in Chinese).

880 Xiao, J., Xu, Q., Nakamura, T., Yang, X., Liang, W., and Inouchi, Y.: Holocene vegetation  
881 variation in the Daihai Lake region of north-central China: a direct indication of the Asian  
882 monsoon climatic history, *Quaternary Science Reviews*, 23, 1669-1679, 2004.

883 Xiao, X., Haberle, S. G., Shen, J., Yang, X., Han, Y., Zhang, E., and Wang, S.: Latest  
884 Pleistocene and Holocene vegetation and climate history inferred from an alpine  
885 lacustrine record, northwestern Yunnan Province, southwestern China, *Quaternary*  
886 *Science reviews*, 86, 35-48, 2014.

887 Xie, Y., Li, C., Wang, Q., and Yin, H.: Climatic Change Since 9 ka B. P.: Evidence from  
888 Jiangling Area, Jiangnan Plain, China, *Scientia Geographica Sinica*, 2, 199-204, 2006 (in  
889 Chinese).

890 Xin, X., Wu, T., and Zhang, J.: Introduction of CMIP5 experiments carried out with the  
891 climate system models of Beijing climate Center, *Adv. Clim. Change. Res.*, 4, 41-49,  
892 2013.

893 Xu, J.: Analysis of the Holocene Loess Pollen in Xifeng Area and its Vegetation Evolution,  
894 Capital Normal University, Master Dissertation, 2006 (in Chinese).

- 895 Xu, Q., Chen, S., Kong, Z., and Du, N.: Preliminary discussion of vegetation succession and  
896 climate change since the Holocene in the Baiyangdian Lake district, *Acta Phytoecologica*  
897 and *Geobotanica Sinica*, 2, 65-73, 1988 (in Chinese).
- 898 Xu, Q., Yang, Z., Cui, Z., Yang, X., and Liang.: A Study on Pollen Analysis of Qiguoshan  
899 Section and Ancestor Living Environment in Chifeng Area, Nei Mongol, *Scientia*  
900 *Geographica Sinica*, 4, 453-456, 2002 (in Chinese).
- 901 Xu, Y.: The assemblage of Holocene spore pollen and its environment in Bosten Lake area  
902 Xinjiang, *Arid land Geography*, 2, 43-49, 1998 (in Chinese).
- 903 Xue, S., and Li, X.: Holocene vegetation characteristics of the southern loess plateau in the  
904 weihe river valley in china, *Review of Palaeobotany & Palynology*, 160 46-52, 2010.
- 905 Yang, J., Cui, Z., Yi, Zhao., Zhang, W., and Liu, K.: Glacial Lacustrine Sediment's Response  
906 to Climate Change since Holocene in Diancang Mountain, *Acta Geographica Sinica*, 4,  
907 525-533, 2004 (in Chinese).
- 908 Yang, X., Wang, S., and Tong, G.: Character of a nology and changes of monsoon climate  
909 over the last 10000 years in Gucheng Lake, Jiangsu province, *Journal of Integrative Plant*  
910 *Biology*, 7, 576-581, 1996 (in Chinese).
- 911 Yang, Y., and Wang, S.: Study on mire development and paleoenvironment change since  
912 8.0ka B.P. in the northern part of the Sangjiang Plain, *Scientia Geographica Sinica*, 23,  
913 32-38, 2003 (in Chinese).
- 914 Yang, Z.: Reconstruction of climate and environment since the Holocene in Diaojaohaizi  
915 Lake Area, Daqing Mountains, Inner Mongolia, *Acta Ecologica Sinica*, 4, 538-543, 2001  
916 (in Chinese).

- 917 Yu, L., Wang, N., Cheng, H., Long, H., and Zhao, Q.: Holocene environmental change in the  
918 marginal area of the asian monsoon: a record from Zhuye lake, nw china, *Boreas*, 38,  
919 349-361, 2009.
- 920 Yukimoto, S., Adachi, Y., Hosaka, M., Sakami, T., Yoshimura, H., Hirabara, M., Tanaka,  
921 T.Y., Shindo, E., Tsujino, H., Deushi, M., Mizuta, R., Yabu, S., Obata, A., Nakano, H.,  
922 Koshiro, T., Ose, T., and Kitoh, A.: A new global climate model of the meteorological  
923 research institute: MRI-CGCM3-model description and basic performance, *Journal of the*  
924 *Meteorological Society of Japan*, 90A, 23-64, 2012.
- 925 Zhang, W., Mu, K., Cui, Z., Feng, J., and Yang, J.: Record of the environmental change since  
926 Holocene in the region of Gongwang mountain, Yunan Province, *Earth and Environment*,  
927 4, 343-350, 2007 (in Chinese).
- 928 Zhang, Y. G., Pagani, M., and Liu, Z.: A 12-Million-Year Temperature History of the tropical  
929 Pacific Ocean, *Science*, 344, 84-87, 2014.
- 930 Zhang, Y., and Yu, S.: Palynological assemblages of late Quaternary from the Shenzhen  
931 region and its paleoenvironment evolution, 2, 109-114, 1999 (in Chinese).
- 932 Zhang, Y., Jia, L., and Lyu, B.: Studies on Evolution of Vegetation and Climate since 7000  
933 Years ago in Estuary of Changjiang River Region, *Marine Science Bulletin*, 3, 27-34,  
934 2004 (in Chinese).
- 935 Zhang, Y., Song, M., and Welker, J. M.: Simulating Alpine Tundra Vegetation Dynamics in  
936 Response to Global Warming in China, *Global Warming*, Stuart Arthur Harris (Ed.),  
937 ISBN: 978-953-307-149-7, InTech, 11, 221-250, 2010.
- 938 Zhang, Z., Xu, Q., Li, Y., Yang, X., Jin, Z., and Tang, J.: Environmental changes of the Yin  
939 ruins area based on pollen analysis, *Quaternary Science*, 27, 461-468, 2007 (in Chinese).

940 Zhao, J., Hou, Y., Du, J., and Chen, Y.: Holocene environmental changes in the Guanzhong  
941 Plain, 1, 17-22, 2003 (in Chinese).

942 Zhao, Y., Yu, Z., Chen, F., Ito, E., and Zhao, C.: Holocene vegetation and climate history at  
943 Hurleg Lake in the Qaidam Basin, northwest China, Review of Palaeobotany and  
944 palynology, 145, 275-288, 2007.

945 Zheng, R., Xu, X., Zhu, J., Ji, F., Huang, Z., Li, J.: Division of late Quaternary strata and  
946 analysis of palaeoenvironment in Fuzhou Basin, Seismology and Geology, 4, 503-513,  
947 2002 (in Chinese).

948 Zheng, X., Zhang, H., Ming, Q., Chang, F., Meng, H., Zhang, W., Liu, M., Shen, C.:  
949 Vegetational and environmental changes since 15ka B.P. recorded by lake Lugu in the  
950 southwest monsoon domain region, 6, 1314-1326, 2014 (in Chinese).

951 Zhou, J., Liu, D., Zhuang, Z., Wang, Z., and Liu, L.: The sediment layers and the records of  
952 the Paleoenvironment in the Chaoyanggang Lagoon, Rongcheng City of Shandong  
953 Province Since Holocene Transgression, Periodical of Ocean University of China, 38,  
954 803-808, 2008 (in Chinese).

955 Zhu, C., Ma, C., Zhang, W., Zheng, C., Tan, L., Lu, X., Liu, K., and Chen, H.: Pollen record  
956 from Dajiuhu Basin of Shennongjia and environmental changes since 15.753ka B.P.,  
957 Quaternary Sciences, 5, 814-826, 2006 (in Chinese).

958 Zou, S., Cheng, G., Xiao, H., Xu, B., and Feng, Z.: Holocene natural rhythms of vegetation  
959 and present potential ecology in the western Chinese loess plateau, Quaternary  
960 International, 194, 55-67, 2009.

961

962

**Table 1. Basic information of the pollen dataset used in this study**

| Site              | Lat   | Lon    | Alt  | Webb 1-7 | Source                           |
|-------------------|-------|--------|------|----------|----------------------------------|
| Sujiawan          | 35.54 | 104.52 | 1700 | 2        | original data (Zou et al., 2009) |
| Xiaogou           | 36.10 | 104.90 | 1750 | 2        | original data (Wu et al., 2009)  |
| Dadiwan           | 35.01 | 105.91 | 1400 | 1        | original data (Zou et al., 2009) |
| Sanjiaocheng      | 39.01 | 103.34 | 1320 | 1        | Chen et al., 2006                |
| Chadianpo         | 36.10 | 114.40 | 65   | 2        | Zhang et al., 2007               |
| Qindeli           | 48.08 | 133.25 | 60   | 2        | Yang and Wang, 2003              |
| Fuyuanchuangye    | 47.35 | 133.03 | 56   | 3        | Xia, 1988                        |
| Jingbo Lake       | 43.83 | 128.50 | 350  | 2        | Li et al., 2011                  |
| Hani Lake         | 42.22 | 126.52 | 900  | 1        | Cui et al., 2006                 |
| Jinchuan          | 42.37 | 126.43 | 662  | 5        | Jiang et al., 2008               |
| Maar Lake         | 42.30 | 126.37 | 724  | 1        | Liu et al., 2009                 |
| Maar Lake         | 42.30 | 126.37 | 724  | 1        | Liu et al., 2008                 |
| Xie Lake SO4      | 37.38 | 122.52 | 0    | 1        | Zhou et al., 2008                |
| Nanhuiheming Core | 31.05 | 121.58 | 7    | 2        | Jia and Zhang, 2006              |
| Toushe            | 23.82 | 120.88 | 650  | 1        | Liu et al., 2006                 |
| Dongyuan Lake     | 22.17 | 120.83 | 415  | 2        | Lee et al., 2010                 |
| Yonglong CY       | 31.78 | 120.44 | 5    | 3        | Zhang et al., 2004               |
| Hangzhou HZ3      | 30.30 | 120.33 | 6    | 4        | Liu et al., 2007                 |
| Xinhua XH1        | 32.93 | 119.83 | 2    | 3        | Shu et al., 2008                 |
| ZK01              | 31.77 | 119.80 | 6    | 2        | Shu et al., 2007                 |
| Chifeng           | 43.97 | 119.37 | 503  | 2        | Xu et al., 2002                  |
| SZK1              | 26.08 | 119.31 | 9    | 1        | Zheng et al., 2002               |
| Gucheng           | 31.28 | 118.90 | 6    | 4        | Yang et al., 1996                |
| Lulong            | 39.87 | 118.87 | 23   | 2        | Kong et al., 2000                |
| Hulun Lake        | 48.92 | 117.42 | 545  | 1        | Wen et al., 2010                 |
| CH-1              | 31.56 | 117.39 | 5    | 2        | Wang et al., 2008                |
| Sanyi profile     | 43.62 | 117.38 | 1598 | 4        | Wang et al., 2005                |
| Xiaoniuchang      | 42.62 | 116.82 | 1411 | 1        | Liu et al., 2002                 |
| Haoluku           | 42.87 | 116.76 | 1333 | 2        | Liu et al., 2002                 |
| Liuzhouwan        | 42.71 | 116.68 | 1410 | 7        | Liu et al., 2002                 |
| Poyang Lake 103B  | 28.87 | 116.25 | 16   | 4        | Jiang and Piperno, 1999          |
| Baiyangdian       | 38.92 | 115.84 | 8    | 2        | Xu et al., 1988                  |
| Bayanchagan       | 42.08 | 115.35 | 1355 | 1        | Jiang et al., 2006               |
| Huangjiapu        | 40.57 | 115.15 | 614  | 7        | Sun et al., 2001                 |
| Dingnan           | 24.68 | 115.00 | 250  | 2        | Xiao et al., 2007                |
| Guang1            | 36.02 | 114.53 | 56   | 1        | Zhang et al., 2007               |
| Angulinao         | 41.33 | 114.35 | 1315 | 1        | Liu et al., 2010                 |
| Yangyuanxipu      | 40.12 | 114.22 | 921  | 6        | Wang et al., 2003                |

|                               |       |        |      |   |                        |
|-------------------------------|-------|--------|------|---|------------------------|
| <b>Shenzhen Sx07</b>          | 22.75 | 113.78 | 2    | 2 | Zhang and Yu, 1999     |
| <b>GZ-2</b>                   | 22.71 | 113.51 | 1    | 7 | Wang et al., 2010      |
| <b>Daihai99a</b>              | 40.55 | 112.66 | 1221 | 2 | Xiao et al., 2004      |
| <b>Daihai</b>                 | 40.55 | 112.66 | 1221 | 2 | Sun et al., 2006       |
| <b>Sihean profile</b>         | 34.80 | 112.40 | 251  | 1 | Sun and Xia, 2005      |
| <b>Diaojiaohaizi</b>          | 41.30 | 112.35 | 2015 | 1 | Yang et al., 2001      |
| <b>Ganhaizi</b>               | 39.00 | 112.30 | 1854 | 3 | Meng et al., 2007      |
| <b>Jiangling profile</b>      | 30.35 | 112.18 | 37   | 1 | Xie et al., 2006       |
| <b>Helingeer</b>              | 40.38 | 111.82 | 1162 | 3 | Li et al., 2011        |
| <b>Shennongjia2</b>           | 31.75 | 110.67 | 1700 | 1 | Liu et al., 2001       |
| <b>Huguangyan Maar Lake B</b> | 21.15 | 110.28 | 59   | 2 | Wang et al., 2007      |
| <b>Yaoxian</b>                | 35.93 | 110.17 | 1556 | 2 | Li et al., 2003        |
| <b>Jixian</b>                 | 36.00 | 110.06 | 1005 | 6 | Xia et al., 2002       |
| <b>Shennongjia Dajiu Lake</b> | 31.49 | 110.00 | 1760 | 2 | Zhu et al., 2006       |
| <b>Qigai nuur</b>             | 39.50 | 109.85 | 1300 | 1 | Sun and Feng, 2013     |
| <b>Beizhuangcun</b>           | 34.35 | 109.53 | 519  | 1 | Xue et al., 2010       |
| <b>Lantian</b>                | 34.15 | 109.33 | 523  | 1 | Li and Sun, 2005       |
| <b>Bahanniao</b>              | 39.32 | 109.27 | 1278 | 1 | Guo et al., 2007       |
| <b>Midiwan</b>                | 37.65 | 108.62 | 1400 | 1 | Li et al., 2003        |
| <b>Jinbian</b>                | 37.50 | 108.33 | 1688 | 2 | Cheng, 2011            |
| <b>Xindian</b>                | 34.38 | 107.80 | 608  | 1 | Xue et al., 2010       |
| <b>Nanguanzhuang</b>          | 34.43 | 107.75 | 702  | 1 | Zhao et al., 2003      |
| <b>Xifeng</b>                 | 35.65 | 107.68 | 1400 | 3 | Xu, 2006               |
| <b>Jiyuan</b>                 | 37.13 | 107.40 | 1765 | 3 | Li et al., 2011        |
| <b>Jiacunyuan</b>             | 34.27 | 106.97 | 1497 | 2 | Gong, 2006             |
| <b>Dadiwan</b>                | 35.01 | 105.91 | 1400 | 1 | Zou et al., 2009       |
| <b>Maying</b>                 | 35.34 | 104.99 | 1800 | 1 | Tang and An, 2007      |
| <b>Huiningxiaogou</b>         | 36.10 | 104.90 | 1750 | 2 | Wu et al., 2009        |
| <b>Sujiawan</b>               | 35.54 | 104.52 | 1700 | 2 | Zou et al., 2009       |
| <b>QTH02</b>                  | 39.07 | 103.61 | 1302 | 1 | Li et al., 2009        |
| <b>Laotanfang</b>             | 26.10 | 103.20 | 3579 | 2 | Zhang et al., 2007     |
| <b>Hongshui River2</b>        | 38.17 | 102.76 | 1511 | 1 | Ma et al., 2003,       |
| <b>Ruoergai</b>               | 33.77 | 102.55 | 3480 | 1 | Cai, 2006              |
| <b>Hongyuan</b>               | 32.78 | 102.52 | 3500 | 2 | Wang et al., 2006      |
| <b>Dahaizi</b>                | 27.50 | 102.33 | 3660 | 1 | Li et al., 1988        |
| <b>Shayema Lake</b>           | 28.58 | 102.22 | 2453 | 1 | Tang and Shen, 1996    |
| <b>Luanhaizi</b>              | 37.59 | 101.35 | 3200 | 5 | Herzschuh et al., 2006 |
| <b>Lugu Lake</b>              | 27.68 | 100.80 | 2692 | 1 | Zheng et al., 2014     |
| <b>Qinghai Lake</b>           | 36.93 | 100.73 | 3200 | 2 | Shen et al., 2004      |
| <b>Dalianhai</b>              | 36.25 | 100.41 | 2850 | 3 | Cheng et al., 2010     |
| <b>Erhai ES Core</b>          | 25.78 | 100.19 | 1974 | 1 | Shen et al., 2006      |
| <b>Xianmachi profile</b>      | 25.97 | 99.87  | 3820 | 7 | Yang et al., 2004      |

|                            |       |        |      |   |                          |
|----------------------------|-------|--------|------|---|--------------------------|
| <b>TCK1</b>                | 26.63 | 99.72  | 3898 | 1 | Xiao et al., 2014        |
| <b>Yidun Lake</b>          | 30.30 | 99.55  | 4470 | 4 | Shen et al., 2006        |
| <b>Kuhai lake</b>          | 35.30 | 99.20  | 4150 | 1 | Wischnewski et al., 2011 |
| <b>Koucha lake</b>         | 34.00 | 97.20  | 4540 | 2 | Herzschuh et al., 2009   |
| <b>Hurleg</b>              | 37.28 | 96.90  | 2817 | 2 | Zhao et al., 2007        |
| <b>Basu</b>                | 30.72 | 96.67  | 4450 | 3 | Tang et al., 1998        |
| <b>Tuolekule</b>           | 43.34 | 94.21  | 1890 | 1 | An et al., 2011          |
| <b>Balikun</b>             | 43.62 | 92.77  | 1575 | 1 | Tao et al., 2010         |
| <b>Cuona</b>               | 31.47 | 91.51  | 4515 | 3 | Tang et al., 2009        |
| <b>Dongdaohaizi2</b>       | 44.64 | 87.58  | 402  | 1 | Li et al., 2001          |
| <b>Bositeng Lake</b>       | 41.96 | 87.21  | 1050 | 1 | Xu, 1998                 |
| <b>Cuoqin</b>              | 31.00 | 85.00  | 4648 | 4 | Luo, 2008                |
| <b>Yili</b>                | 43.86 | 81.97  | 928  | 2 | Li et al., 2011          |
| <b>Bangong Lake</b>        | 33.75 | 78.67  | 4241 | 1 | Huang et al., 1996       |
| <b>Shengli</b>             | 47.53 | 133.87 | 52   | 2 | CQPD, 2000               |
| <b>Qingdeli</b>            | 48.05 | 133.17 | 52   | 1 | CQPD, 2000               |
| <b>Changbaishan</b>        | 42.22 | 126.00 | 500  | 2 | CQPD, 2000               |
| <b>Liuhe</b>               | 42.90 | 125.75 | 910  | 7 | CQPD, 2000               |
| <b>Shuangyang</b>          | 43.27 | 125.75 | 215  | 1 | CQPD, 2000               |
| <b>Xiaonan</b>             | 43.33 | 125.33 | 209  | 1 | CQPD, 2000               |
| <b>Tailai</b>              | 46.40 | 123.43 | 146  | 5 | CQPD, 2000               |
| <b>Sheli</b>               | 45.23 | 123.31 | 150  | 4 | CQPD, 2000               |
| <b>Tongtu</b>              | 45.23 | 123.30 | 150  | 7 | CQPD, 2000               |
| <b>Yueyawan</b>            | 37.98 | 120.71 | 5    | 1 | CQPD, 2000               |
| <b>Beiwangxu</b>           | 37.75 | 120.61 | 6    | 1 | CQPD, 2000               |
| <b>East Tai Lake1</b>      | 31.30 | 120.60 | 3    | 1 | CQPD, 2000               |
| <b>Suzhou</b>              | 31.30 | 120.60 | 2    | 7 | CQPD, 2000               |
| <b>Sun-Moon Lake</b>       | 23.51 | 120.54 | 726  | 2 | CQPD, 2000               |
| <b>West Tai Lake</b>       | 31.30 | 119.80 | 1    | 1 | CQPD, 2000               |
| <b>Changzhou</b>           | 31.43 | 119.41 | 5    | 1 | CQPD, 2000               |
| <b>Dazeyin</b>             | 39.50 | 119.17 | 50   | 7 | CQPD, 2000               |
| <b>Hailaer</b>             | 49.17 | 119.00 | 760  | 2 | CQPD, 2000               |
| <b>Cangumiao</b>           | 39.97 | 118.60 | 70   | 1 | CQPD, 2000               |
| <b>Qianhuzhuang</b>        | 40.00 | 118.58 | 80   | 6 | CQPD, 2000               |
| <b>Reshuitang</b>          | 43.75 | 117.65 | 1200 | 1 | CQPD, 2000               |
| <b>Yangerzhuang</b>        | 38.20 | 117.30 | 5    | 7 | CQPD, 2000               |
| <b>Mengcun</b>             | 38.00 | 117.06 | 7    | 5 | CQPD, 2000               |
| <b>Hanjiang-CH2</b>        | 23.48 | 116.80 | 5    | 2 | CQPD, 2000               |
| <b>Hanjiang-SH6</b>        | 23.42 | 116.68 | 3    | 7 | CQPD, 2000               |
| <b>Hanjiang-SH5</b>        | 23.45 | 116.67 | 8    | 2 | CQPD, 2000               |
| <b>Hulun Lake</b>          | 48.90 | 116.50 | 650  | 1 | CQPD, 2000               |
| <b>Heitutang</b>           | 40.38 | 113.74 | 1060 | 1 | CQPD, 2000               |
| <b>Zhujiang delta PK16</b> | 22.73 | 113.72 | 15   | 7 | CQPD, 2000               |

|                          |       |        |      |   |            |
|--------------------------|-------|--------|------|---|------------|
| <b>Angulitun</b>         | 41.30 | 113.70 | 1400 | 7 | CQPD, 2000 |
| <b>Bataigou</b>          | 40.92 | 113.63 | 1357 | 1 | CQPD, 2000 |
| <b>Dahewan</b>           | 40.87 | 113.57 | 1298 | 2 | CQPD, 2000 |
| <b>Yutubao</b>           | 40.75 | 112.67 | 1254 | 7 | CQPD, 2000 |
| <b>Zhujiang delta K5</b> | 22.78 | 112.63 | 12   | 1 | CQPD, 2000 |
| <b>Da-7</b>              | 40.52 | 112.62 | 1200 | 3 | CQPD, 2000 |
| <b>Hahai-1</b>           | 40.17 | 112.50 | 1200 | 5 | CQPD, 2000 |
| <b>Wajianggou</b>        | 40.50 | 112.50 | 1476 | 4 | CQPD, 2000 |
| <b>Shuidong Core A1</b>  | 21.75 | 111.07 | -8   | 2 | CQPD, 2000 |
| <b>Dajahu</b>            | 31.50 | 110.33 | 1700 | 2 | CQPD, 2000 |
| <b>Tianshuigou</b>       | 34.87 | 109.73 | 360  | 7 | CQPD, 2000 |
| <b>Mengjiawan</b>        | 38.60 | 109.67 | 1190 | 7 | CQPD, 2000 |
| <b>Fuping BK13</b>       | 34.70 | 109.25 | 422  | 7 | CQPD, 2000 |
| <b>Yaocun</b>            | 34.70 | 109.22 | 405  | 2 | CQPD, 2000 |
| <b>Jinbian</b>           | 37.80 | 108.60 | 1400 | 4 | CQPD, 2000 |
| <b>Dishaogou</b>         | 37.83 | 108.45 | 1200 | 2 | CQPD, 2000 |
| <b>Shuidonggou</b>       | 38.20 | 106.57 | 1200 | 5 | CQPD, 2000 |
| <b>Jiuzhoutai</b>        | 35.90 | 104.80 | 2136 | 7 | CQPD, 2000 |
| <b>Luojiashan</b>        | 27.50 | 102.40 | 3800 | 1 | CQPD, 2000 |
| <b>RM-F</b>              | 33.08 | 102.35 | 3400 | 2 | CQPD, 2000 |
| <b>Hongyuan</b>          | 33.25 | 101.57 | 3492 | 1 | CQPD, 2000 |
| <b>Wasong</b>            | 33.20 | 101.52 | 3490 | 1 | CQPD, 2000 |
| <b>Guhu Core 28</b>      | 27.67 | 100.83 | 2780 | 7 | CQPD, 2000 |
| <b>Napahai Core 34</b>   | 27.80 | 99.60  | 3260 | 2 | CQPD, 2000 |
| <b>Lop Nur</b>           | 40.50 | 90.25  | 780  | 7 | CQPD, 2000 |
| <b>Chaiwobao1</b>        | 43.55 | 87.78  | 1100 | 2 | CQPD, 2000 |
| <b>Chaiwobao2</b>        | 43.33 | 87.47  | 1114 | 1 | CQPD, 2000 |
| <b>Manasi</b>            | 45.97 | 84.83  | 257  | 2 | CQPD, 2000 |
| <b>Wuqia</b>             | 43.20 | 83.50  | 1000 | 7 | CQPD, 2000 |
| <b>Madagou</b>           | 37.00 | 80.70  | 1370 | 2 | CQPD, 2000 |
| <b>Tongyu</b>            | 44.83 | 123.10 | 148  | 5 | CQPD, 2000 |
| <b>Nanjing</b>           | 32.15 | 119.05 | 10   | 2 | CQPD, 2000 |
| <b>Banpo</b>             | 34.27 | 109.03 | 395  | 1 | CQPD, 2000 |
| <b>QL-1</b>              | 34.00 | 107.58 | 2200 | 7 | CQPD, 2000 |
| <b>Dalainu</b>           | 43.20 | 116.60 | 1290 | 7 | CQPD, 2000 |
| <b>Qinghai</b>           | 36.55 | 99.60  | 3196 | 2 | CQPD, 2000 |

964

965

966

967

968

**Table 2. Earth's orbital parameters and trace gases as recommended by the PMIP3 project**

| Simulation | Orbital parameters |               |                        | Trace gases            |                        |                        |
|------------|--------------------|---------------|------------------------|------------------------|------------------------|------------------------|
|            | Eccentricity       | Obliquity( °) | Angular precession( °) | CO <sub>2</sub> (ppmv) | CH <sub>4</sub> (ppbv) | N <sub>2</sub> O(ppbv) |
| <b>PI</b>  | 0,0167724          | 23,446        | 102,04                 | 280                    | 760                    | 270                    |
| <b>MH</b>  | 0,018682           | 24,105        | 0,87                   | 280                    | 650                    | 270                    |

**Table 3. PMIP3 model characteristics and references**

| <i>Model Name</i>    | <i>Modelling centre</i> | <i>Type</i> | <i>Grid</i>                            | <i>Reference</i>         |
|----------------------|-------------------------|-------------|----------------------------------------|--------------------------|
| <b>BCC-CSM-1-1</b>   | BCC-CMA (China)         | AOVGCM      | Atm: 128×64×L26; Ocean: 360×232×L40    | Xin et al. (2013)        |
| <b>CCSM4</b>         | NCAR (USA)              | AOGCM       | Atm: 288 × 192×L26; Ocean: 320×384×L60 | Gent et al. (2011)       |
| <b>CNRM-CM5</b>      | CNRM&CERFACS (France)   | AOGCM       | Atm: 256 × 128×L31; Ocean: 362×292×L42 | Voldoire et al. (2012)   |
| <b>CSIRO-Mk3-6-0</b> | QCCCE, Australia        | AOGCM       | Atm: 192 × 96×L18; Ocean: 192×192×L31  | Jeffrey et al. (2013)    |
| <b>FGOALS-g2</b>     | LASG-IAP (China)        | AOVGCM      | Atm: 128 × 60×L26; Ocean: 360×180×L30  | Li et al. (2013)         |
| <b>FGOALS-s2</b>     | LASG-IAP (China)        | AOVGCM      | Atm: 128 × 108×L26; Ocean: 360×180×L30 | Bao et al. (2013)        |
| <b>GISS-E2-R</b>     | GISS (USA)              | AOGCM       | Atm: 144 × 90×L40; Ocean: 288×180×L32  | Schmidt et al. (2014a,b) |
| <b>HadGEM2-CC</b>    | Hadley Centre (UK)      | AOVGCM      | Atm: 192 × 145×L60; Ocean: 360×216×L40 | Collins et al. (2011)    |
| <b>HadGEM2-ES</b>    | Hadley Centre (UK)      | AOVGCM      | Atm: 192 × 145×L38; Ocean: 360×216×L40 | Collins et al. (2011)    |
| <b>IPSL-CM5A-LR</b>  | IPSL (France)           | AOVGCM      | Atm: 96 × 96×L39; Ocean: 182×149×L31   | Dufresne et al. (2013)   |
| <b>MIROC-ESM</b>     | Utokyo&NIES (Japan)     | AOVGCM      | Atm: 128×64×L80; Ocean: 256×192×L44    | Watanabe et al. (2011)   |
| <b>MPI-ESM-P</b>     | MPI (Germany)           | AOGCM       | Atm: 196×98×L47; Ocean: 256×220×L40    | Giorgetta et al. (2013)  |
| <b>MRI-CGCM3</b>     | MRI (Japan)             | AOGCM       | Atm: 320 × 160×L48; Ocean: 364×368×L51 | Yukimoto et al. (2012)   |

**Table 4. Important values for each plant life form used in the  $\Delta V$  statistical calculation as assigned to the megabiomes**

| <i>Megabiomes</i>                  | <i>Life form</i> |                    |                    |
|------------------------------------|------------------|--------------------|--------------------|
|                                    | <b>Trees</b>     | <b>Grass/grass</b> | <b>Bare ground</b> |
| <i>Tropical forest</i>             | 1                |                    |                    |
| <i>Warm mixed forest</i>           | 1                |                    |                    |
| <i>Temperate forest</i>            | 1                |                    |                    |
| <i>Boreal forest</i>               | 1                |                    |                    |
| <i>Grassland and dry shrubland</i> | 0.25             | 0.75               |                    |
| <i>Savanna and dry woodland</i>    | 0.5              | 0.5                |                    |
| <i>Desert</i>                      |                  | 0.25               | 0.75               |
| <i>Tundra</i>                      |                  | 0.75               | 0.25               |

**Table 5. Attribute values and the weights for plant life forms used by the  $\Delta V$  statistic**

| <i>Life form</i>                   | <i>Attribute</i> |               |          |        |
|------------------------------------|------------------|---------------|----------|--------|
| <b>Trees</b>                       | Evergreen        | Needle-leaf   | Tropical | Boreal |
| <i>Tropical forest</i>             | 1                | 0             | 1        | 0      |
| <i>Warm mixed forest</i>           | 0.75             | 0.25          | 0        | 0      |
| <i>Temperate forest</i>            | 0.5              | 0.5           | 0        | 0.5    |
| <i>Boreal forest</i>               | 0.25             | 0.75          | 0        | 1      |
| <i>Grassland and dry shrubland</i> | 0.75             | 0.25          | 0.75     | 0      |
| <i>Savanna and dry woodland</i>    | 0.25             | 0.75          | 0        | 0.5    |
| <i>weights</i>                     | 0.2              | 0.2           | 0.3      | 0.3    |
| <b>Grass/Shrub</b>                 | Warm             | Arctic/alpine |          |        |
| <i>Grassland and dry shrubland</i> | 1                | 0             |          |        |
| <i>Savanna and dry woodland</i>    | 0.75             | 0             |          |        |
| <i>Desert</i>                      | 1                | 0             |          |        |
| <i>Tundra</i>                      | 0                | 1             |          |        |
| <i>weights</i>                     | 0.5              | 0.5           |          |        |
| <b>Bare Ground</b>                 | Arctic/alpine    |               |          |        |
| <i>Desert</i>                      | 0                |               |          |        |
| <i>Tundra</i>                      | 1                |               |          |        |
| <i>weight</i>                      | 1                |               |          |        |

**Table 6. Regression coefficients between the reconstructed climates by inverse vegetation models and observed meteorological values**

| Climate parameter | Slope     | Intercept   | R    | ME     | RMSE   |
|-------------------|-----------|-------------|------|--------|--------|
| <b>MAT</b>        | 0.82±0.02 | 0.92±0.18   | 0.89 | 0.16   | 3.25   |
| <b>MTCO (jan)</b> | 0.81±0.01 | -1.79±0.18  | 0.95 | -0.17  | 3.19   |
| <b>MTWA (jul)</b> | 0.75±0.03 | 4.57±0.60   | 0.75 | -0.19  | 4.02   |
| <b>MAP</b>        | 1.15±0.02 | 32.90±18.41 | 0.94 | 138.01 | 263.88 |
| <b>Pjan</b>       | 1.01±0.02 | 0.32±0.47   | 0.94 | 0.52   | 8.89   |
| <b>Pjul</b>       | 1.30±0.03 | -21.67±4.52 | 0.89 | 16.45  | 52.9   |

The climatic parameters used for regression are the actual values. MAT annual mean temperature, MTCO mean temperature of the coldest month, MTWA mean temperature of the warmest month, MAP annual precipitation, RMSE the root-mean-square error of the residuals, ME mean error of the residuals, Pjan: precipitation of January, Pjul: precipitation of July, R is the correlation coefficient, ± stand error

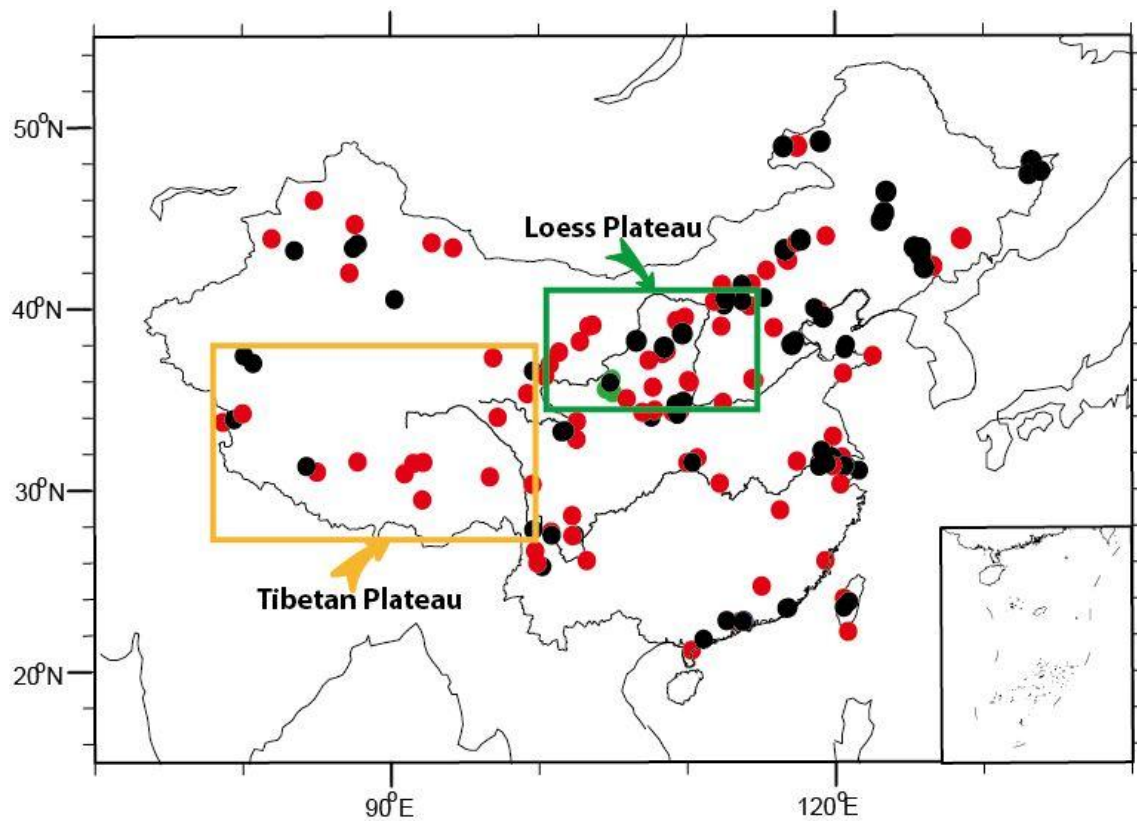

**Figure 1.** Distribution of pollen sites during mid-Holocene period in China. Black circle is the original China Quaternary Pollen Database, red circles are digitized ones from published papers, green circles represent the three original pollen data used in this study.

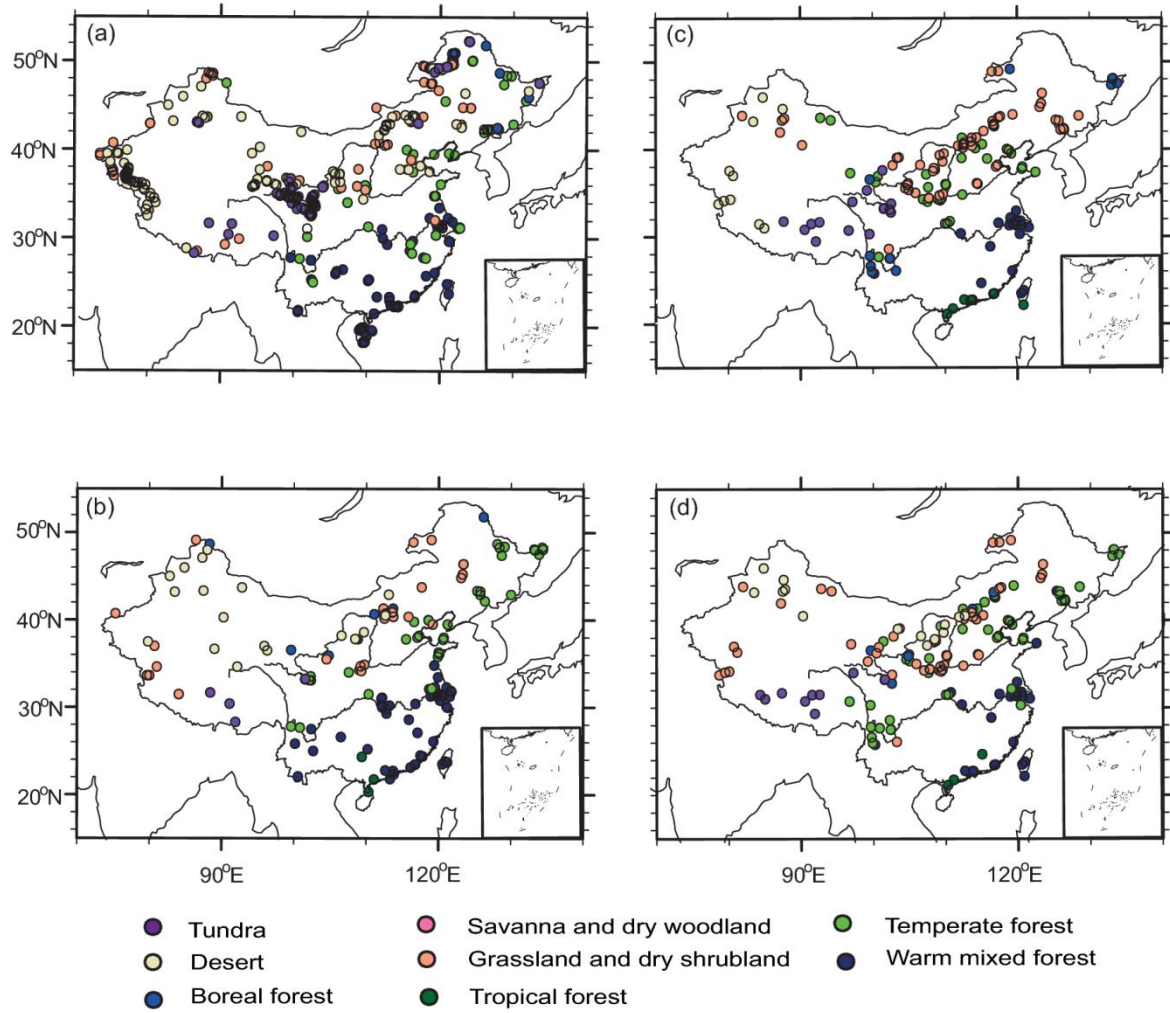

**Figure 2.** Comparison of megabiomes for PI (first row) and the MH (second row): (a,b) BIOME6000, (c,d) pollen data collected in this study.

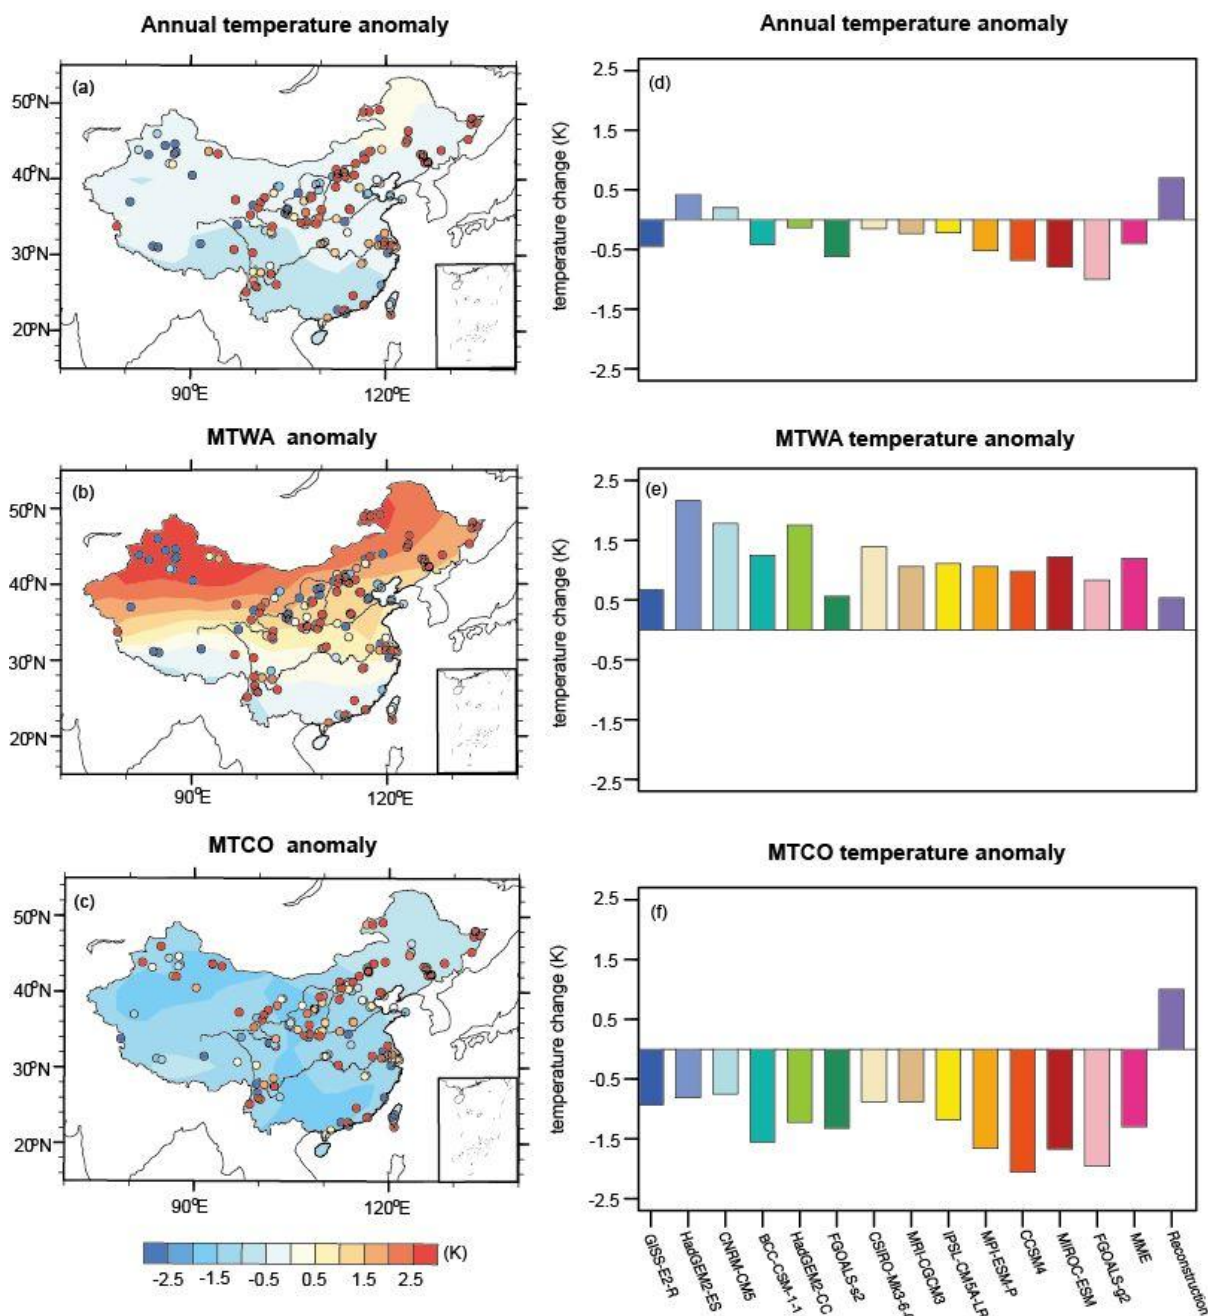

**Figure 3.** Model-data comparison for annual and seasonal (MTWA and MTCO) temperature (K). For the left panel (a-c), points represent the reconstruction from IVM, shades show the last 30-year means simulation results of multi-model ensemble (MME) for 13 PMIP3 models. The grid mean value of temperature for each model, MME and reconstruction are also displayed at the right panel (d-f).

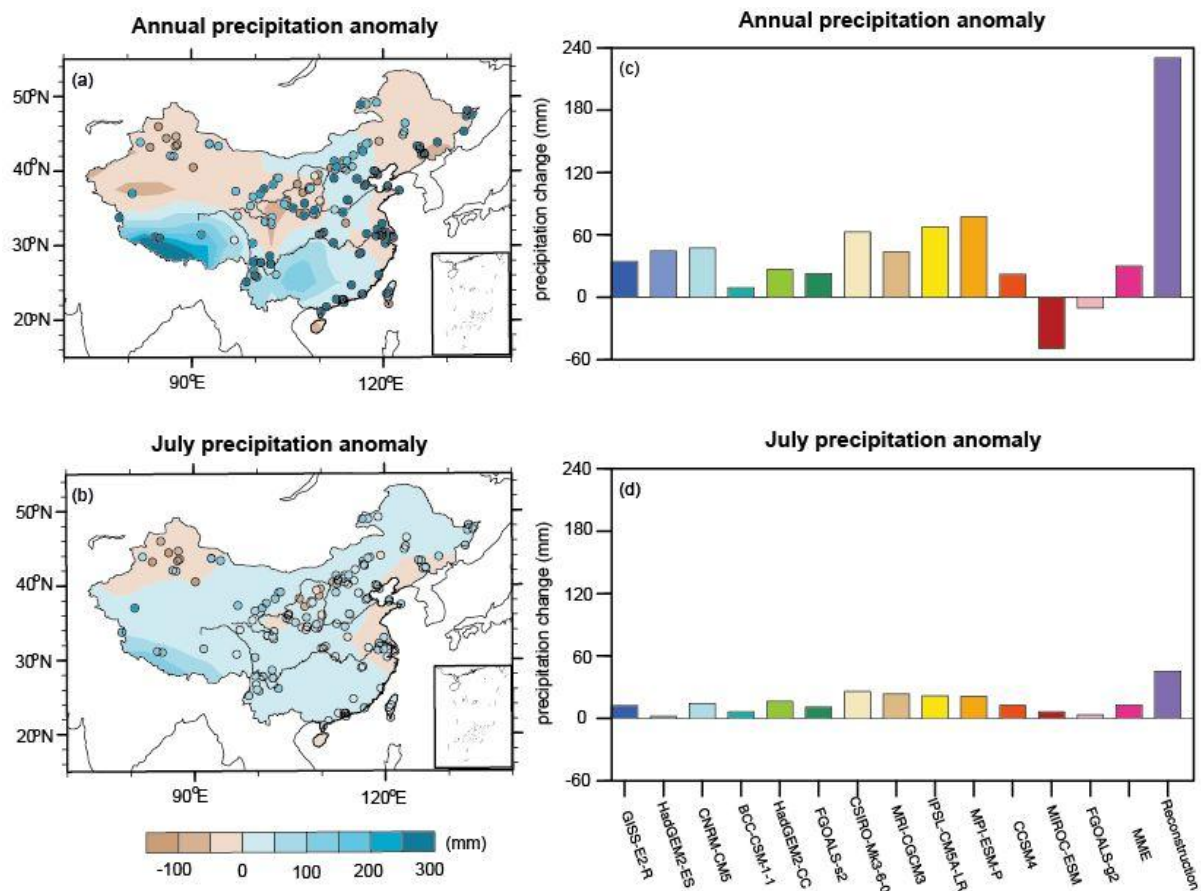

**Figure 4.** Model-data comparison for annual and July precipitation (mm). For the left panel (a,b), points represent the reconstruction from IVM, shades show the last 30-year means simulation results of multi-model ensemble (MME) for 13 PMIP3 models. The grid mean value of precipitation for each model, MME and reconstruction are also displayed at the right panel (c,d).

1082

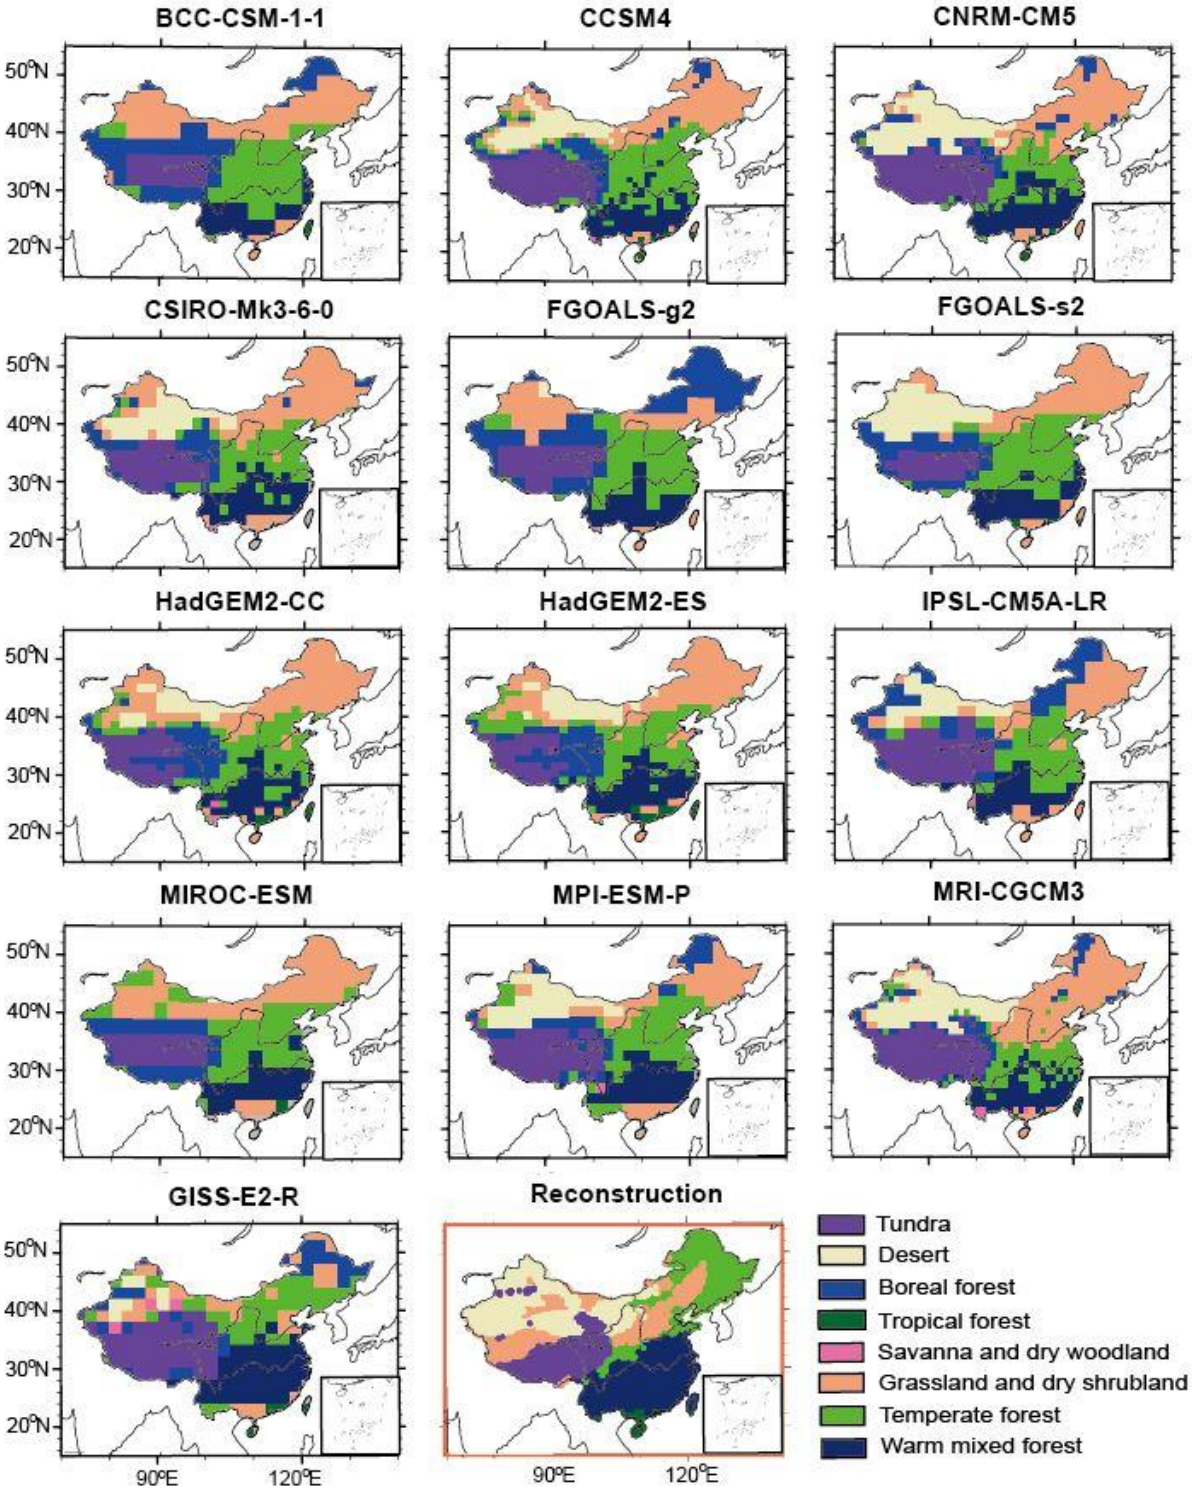

1083

1084

1085

1086

1087

1088

**Figure 5.** Comparison of interpolated megabiomes distribution (plot in red rectangle) with the simulated spatial pattern from BIOME4 for each model during mid-Holocene.

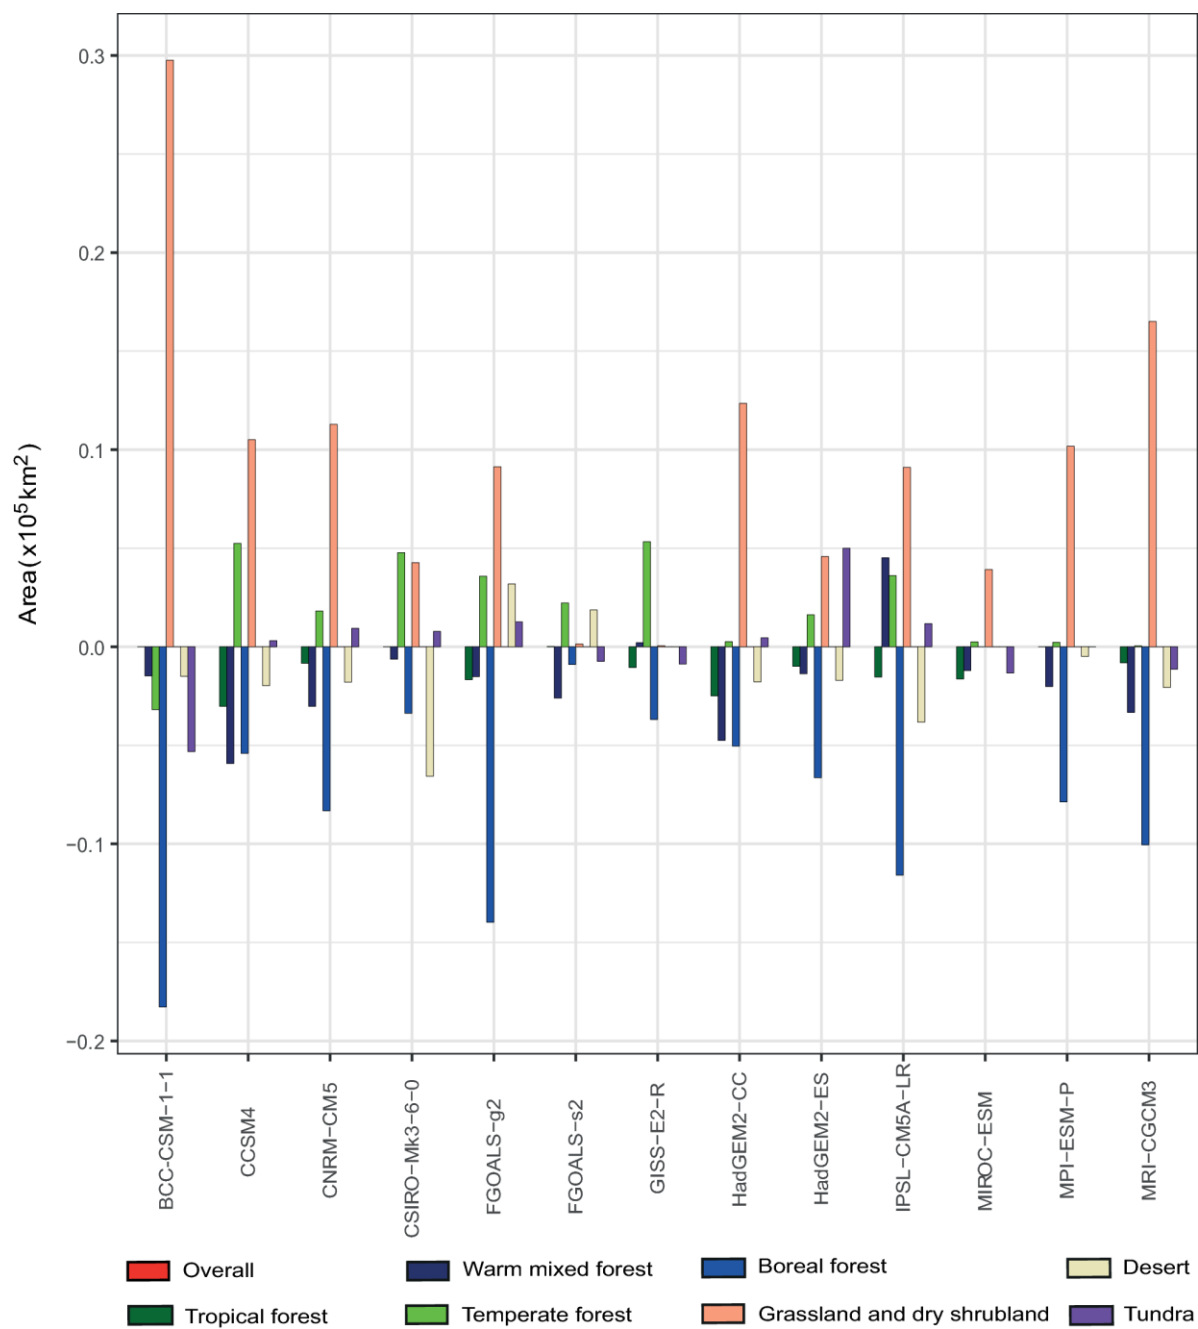

**Figure 6.** Changes in the extent of each megabiome as a consequence of simulated climate changes for each model, both expressed as change relative to the PI extent of same megabiome.

**Figure 6.** Changes in the extent of each megabiome as a consequence of simulated climate changes for each model, both expressed as change relative to the PI extent of same megabiome.

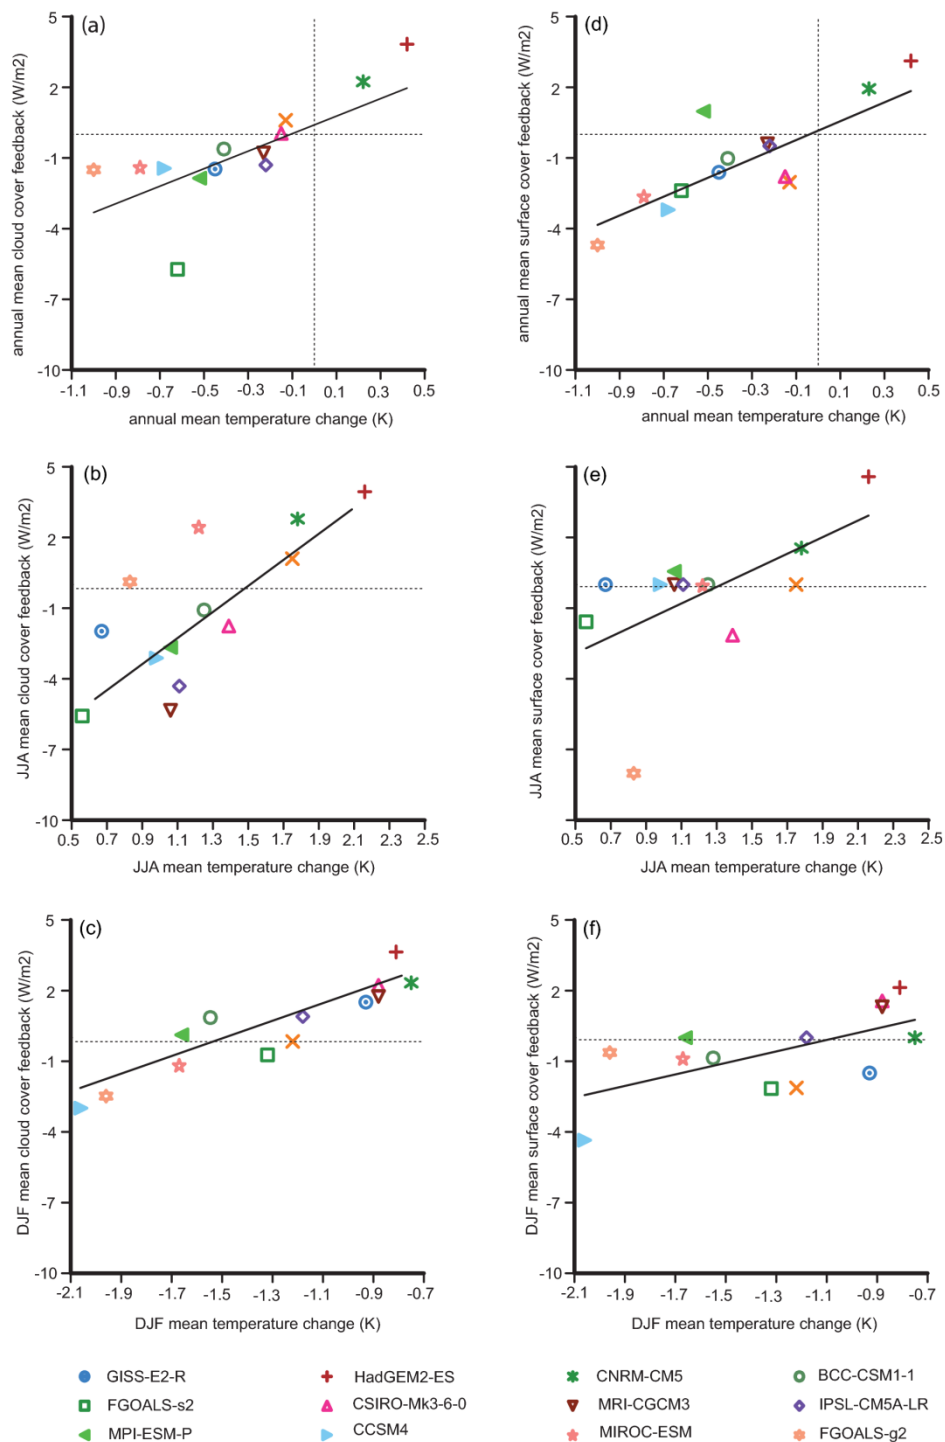

1132  
1133  
1134  
1135  
1136  
1137  
1138  
1139  
1140  
1141  
1142  
1143  
1144  
1145

**Figure 7.** Scatter plots showing temperature, cloud cover feedback and surface albedo feedback changes during the MH. The values shown are the simulated 30-year mean anomaly (MH-PI) for the 13 models. **a**, annual mean temperature relative to the annual mean cloud cover feedback and **d**, annual surface albedo feedback. **b**, Summer (JJA) mean temperature relative to the summer mean cloud cover feedback and **e**, Summer surface albedo feedback. **c**, Winter (DJF) mean temperature relative to the summer mean cloud cover feedback and **f**, Winter surface albedo feedback. The horizontal and vertical lines in plots represent the value of 0.

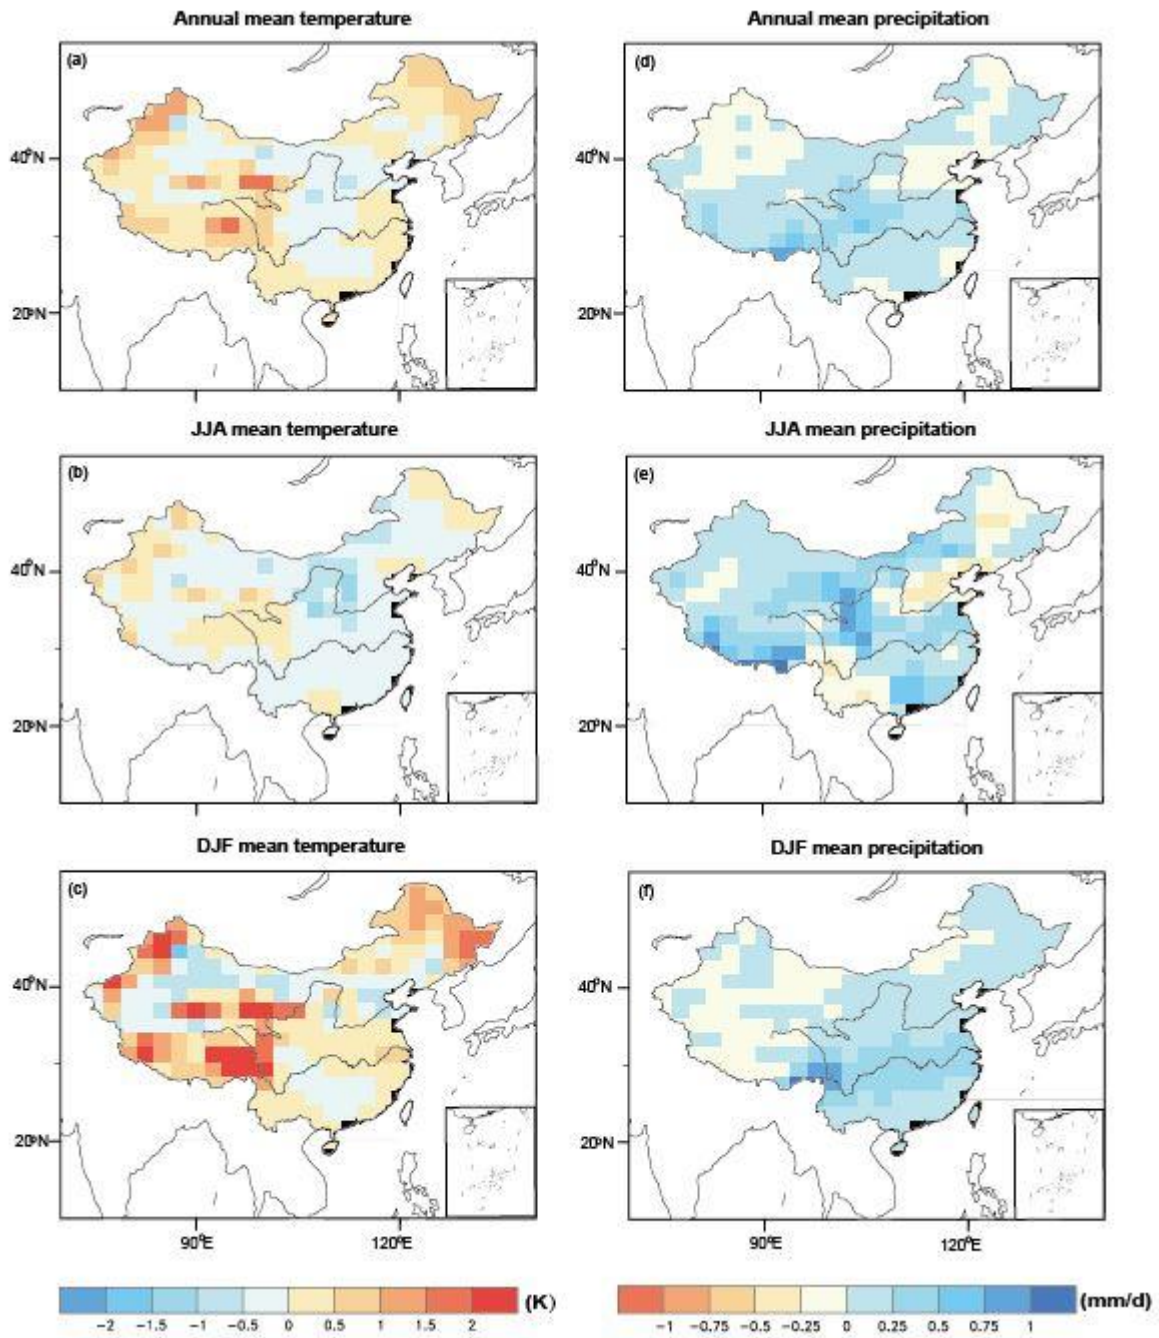

**Figure 8.** Climate anomalies between the two experiments (6 ka and 6 ka\_VEG) conducted in CESM version 1.0.5. The anomalies (6 ka\_VEG-6 ka) of temperature and precipitation at both annual and seasonal scale are presented, and all these climate variables are calculated as the last 50-year means from two simulations.
